# Supplementary material for: Dominant Vibrio cholerae phage exhibits lysis inhibition sensitive to disruption by a defensive phage satellite
Source: eLife. 2020 Apr 24;9:e53200. doi: 10.7554/eLife.53200 (PMC7182436; doi:10.7554/eLife.53200)
Supplement: Figure 1—source data 1. [file elife-53200-fig1-data1.xlsx]

## Sheet: 1C
Time in minutes	PLE (-) V. cholerae ICP1 MOI 1				PLE (-) V. cholerae ICP1 MOI 1 MOSI 5
0	0.0656	0.0655	0.0629	0.0764	0.0644	0.0631	0.0655	0.0769
2	0.0638	0.0616	0.0582	0.0675	0.0641	0.0617	0.0627	0.07
6	0.0574	0.0523	0.0512	0.0602	0.0532	0.0509	0.0532	0.061
8	0.0571	0.0673	0.0477	0.0556	0.0508	0.0487	0.0509	0.0573
10	0.0509	0.0471	0.0454	0.0519	0.0486	0.0468	0.0488	0.0543
12	0.0484	0.0448	0.0433	0.0496	0.0468	0.0451	0.0471	0.0522
14	0.0465	0.0436	0.0419	0.0483	0.0452	0.0448	0.0678	0.0507
16	0.0455	0.0426	0.0411	0.0468	0.0445	0.0435	0.045	0.0493
18	0.0452	0.0425	0.0408	0.0474	0.044	0.0432	0.0451	0.05
20	0.0446	0.0425	0.0402	0.0474	0.044	0.0437	0.0449	0.0501
22	0.043	0.0402	0.0364	0.0461	0.0438	0.0439	0.0448	0.0507
24	0.0375	0.0349	0.0294	0.0402	0.0438	0.0441	0.0445	0.0506
26	0.0311	0.0296	0.0252	0.0317	0.0434	0.0446	0.0441	0.0497
28	0.0295	0.0286	0.0246	0.0303	0.0429	0.0451	0.0439	0.0506
30	0.0295	0.0287	0.0245	0.0306	0.0429	0.0456	0.0439	0.051
32	0.0299	0.0292	0.0248	0.0307	0.0426	0.0461	0.0442	0.0512
34	0.0301	0.0296	0.0251	0.0314	0.0428	0.046	0.0447	0.0514
36	0.0301	0.0298	0.0255	0.032	0.0426	0.0461	0.045	0.0517
38	0.0303	0.0308	0.0257	0.0321	0.0428	0.0468	0.0451	0.0512
40	0.0307	0.0313	0.0265	0.0326	0.0429	0.0469	0.0453	0.0516
42	0.0307	0.0317	0.0265	0.0322	0.0427	0.0473	0.0451	0.0505
44	0.0308	0.0319	0.0267	0.032	0.0427	0.0471	0.0448	0.0505
46	0.0308	0.0322	0.0268	0.0325	0.0425	0.0472	0.0449	0.0503
48	0.0307	0.0324	0.0269	0.0326	0.0425	0.0472	0.044	0.0502
50	0.0303	0.0326	0.0263	0.0336	0.0419	0.047	0.0431	0.051
52	0.0299	0.0326	0.0258	0.0335	0.0417	0.0466	0.0417	0.0506
54	0.0296	0.0331	0.0254	0.0325	0.0412	0.0463	0.0411	0.0495
56	0.0286	0.0333	0.0248	0.033	0.0407	0.0455	0.04	0.0499
58	0.0275	0.033	0.024	0.0329	0.0398	0.0449	0.0388	0.0502
60	0.0262	0.0333	0.0232	0.0322	0.0384	0.0439	0.0375	0.0486
62	0.0248	0.033	0.0224	0.0314	0.0371	0.0429	0.0361	0.048
64	0.0237	0.033	0.0213	0.0303	0.0354	0.0421	0.0343	0.0466
66	0.0224	0.0322	0.0203	0.0299	0.0334	0.0406	0.0325	0.0455
68	0.021	0.0314	0.0194	0.0299	0.0309	0.0391	0.0306	0.0448
70	0.0197	0.0305	0.0185	0.0284	0.0284	0.0378	0.0289	0.0425
72	0.0184	0.0293	0.0175	0.0283	0.0257	0.0362	0.0268	0.0413
74	0.0176	0.0279	0.0166	0.0286	0.0237	0.0347	0.0247	0.0401
76	0.0169	0.0274	0.0158	0.0284	0.0215	0.0331	0.0229	0.0386
78	0.0163	0.0275	0.0154	0.0269	0.0198	0.0321	0.0213	0.0352
80	0.0161	0.0277	0.0148	0.0281	0.0186	0.0309	0.0198	0.0347
82	0.016	0.0281	0.0144	0.0277	0.0176	0.0303	0.0186	0.0326
84	0.0161	0.0289	0.014	0.0296	0.0168	0.0298	0.0175	0.0328
86	0.0278	0.0339	0.0139	0.0306	0.0168	0.0364	0.017	0.0368
88	0.017	0.0309	0.0139	0.0316	0.0167	0.0303	0.0167	0.0322
90	0.0176	0.0322	0.0137	0.0338	0.0208	0.0312	0.0162	0.033

## Sheet: 1D
Time (minutes)	Ethanol Control			DNP Addition
0	0.0741	0.0656	0.0644	0.0714	0.0648	0.0617
2	0.0661	0.0586	0.0571	0.0633	0.0581	0.0553
4	0.0596	0.053	0.0512	0.0568	0.0522	0.0496
6	0.0543	0.048	0.0467	0.0516	0.0472	0.0453
8	0.0495	0.0443	0.0427	0.0472	0.0432	0.0412
10	0.046	0.0405	0.0393	0.0438	0.04	0.0379
12	0.0435	0.0383	0.0369	0.0416	0.0377	0.0355
14	0.0415	0.0365	0.0352	0.0398	0.0358	0.0339
16	0.04	0.0349	0.0339	0.0386	0.0341	0.0323
18	0.0386	0.0334	0.0326	0.0372	0.0329	0.0312
20	0.0361	0.0309	0.0305	0.0344	0.0308	0.0292
22	0.0341	0.0286	0.0284	0.0321	0.0287	0.0271
24	0.0332	0.0275	0.0269	0.0316	0.0275	0.0258
26	0.0332	0.0275	0.0265	0.0319	0.0273	0.0256
32	0.0349	0.0268	0.026	0.0258	0.0199	0.0092
34	0.0358	0.0275	0.0265	0.0203	0.0166	0.008
36	0.0363	0.0283	0.0269	0.0146	0.0104	0.0077
38	0.0367	0.0287	0.0278	0.0123	0.0085	0.0072
40	0.0372	0.0289	0.0276	0.0112	0.0074	0.0065
42	0.0375	0.0292	0.0273	0.0101	0.0065	0.0063
44	0.0372	0.0288	0.0274	0.0092	0.0056	0.0059
46	0.037	0.0286	0.0274	0.0086	0.0053	0.0056
48	0.0366	0.0284	0.0273	0.008	0.0048	0.0054
50	0.0359	0.0279	0.027	0.0078	0.0045	0.0054
52	0.0349	0.0274	0.0265	0.0076	0.0046	0.0054
54	0.0337	0.0264	0.0258	0.0073	0.0044	0.0054
56	0.0324	0.0254	0.025	0.0073	0.0045	0.0052
58	0.0305	0.0239	0.0238	0.0072	0.0043	0.0053
60	0.0288	0.0226	0.0227	0.007	0.0042	0.0052
62	0.0269	0.0209	0.021	0.0071	0.0043	0.0051
64	0.0249	0.019	0.0197	0.0072	0.0043	0.005
66	0.023	0.0172	0.0182	0.007	0.0042	0.005
68	0.021	0.0154	0.0165	0.0071	0.0042	0.0052
70	0.0191	0.0138	0.015	0.0071	0.0044	0.0052
72	0.0173	0.0124	0.0133	0.007	0.0045	0.0052
74	0.0157	0.0108	0.0117	0.0071	0.0041	0.0051
76	0.0143	0.0097	0.0103	0.007	0.0044	0.0053
78	0.0134	0.0086	0.0092	0.0071	0.0042	0.0051
80	0.0124	0.0079	0.0083	0.0072	0.0046	0.0052
82	0.0119	0.0071	0.0076	0.0071	0.0042	0.005
84	0.0112	0.0066	0.0069	0.0069	0.0041	0.0052
86	0.0109	0.0064	0.0065	0.0071	0.0043	0.0052
88	0.0105	0.0063	0.0062	0.007	0.0043	0.005
90	0.0104	0.0061	0.0059	0.007	0.0042	0.005
