# Supplementary material for: Dominant Vibrio cholerae phage exhibits lysis inhibition sensitive to disruption by a defensive phage satellite
Source: eLife. 2020 Apr 24;9:e53200. doi: 10.7554/eLife.53200 (PMC7182436; doi:10.7554/eLife.53200)
Supplement: Figure 2—source data 1. — This spreadsheet contains the data used to create Figures 2C and 4C. [file elife-53200-fig2-data1.xlsx]

## Sheet: Sheet1
All Values in Red AFU/Green AFU
Empty Vector	t T4 holin	teaA ICP1 holin	LidI PLE 1
0.0379146	0.0182408	0.0291278	0.0364019
0.0331965	0.0180377	0.0260205	0.0394937
0.0385243	0.0142568	0.0314183	0.0390409
0.0362908	0.019431	0.025463	0.0429699
