# Supplementary material for: Dominant Vibrio cholerae phage exhibits lysis inhibition sensitive to disruption by a defensive phage satellite
Source: eLife. 2020 Apr 24;9:e53200. doi: 10.7554/eLife.53200 (PMC7182436; doi:10.7554/eLife.53200)
Supplement: Figure 2—source data 2. — This spreadsheet contains the data used to create Figures 2D and 4D. [file elife-53200-fig2-data2.xlsx]

## Sheet: Sheet1
Time in minutes	Empty Vector				teaA ICP1 holin				t T4 holin				LidI PLE 1
0	0.0407	0.053	0.0412	0.0442	0.0394	0.0351	0.0389	0.0341	0.0434	0.0404	0.0411	0.03	0.0396	0.0487	0.0508	0.0341
2	0.0394	0.0504	0.0395	0.0427	0.0374	0.034	0.0367	0.0325	0.0418	0.0397	0.0404	0.0306	0.0382	0.0471	0.0492	0.0332
4	0.039	0.0498	0.0395	0.0421	0.0373	0.0337	0.0363	0.0319	0.0417	0.0397	0.0403	0.031	0.038	0.0469	0.0488	0.0329
6	0.0394	0.0491	0.0393	0.0416	0.0376	0.033	0.0359	0.0316	0.0418	0.0397	0.0407	0.0319	0.038	0.0473	0.0486	0.033
8	0.04	0.0496	0.0391	0.0412	0.0379	0.0333	0.0358	0.0312	0.0425	0.0403	0.0413	0.0323	0.0384	0.0482	0.0485	0.0328
10	0.0408	0.0504	0.0394	0.0415	0.0384	0.0337	0.0357	0.0312	0.0436	0.0413	0.042	0.0329	0.0393	0.0501	0.0487	0.0327
12	0.0419	0.0516	0.0399	0.0416	0.0392	0.0343	0.036	0.0313	0.0449	0.0425	0.0432	0.0349	0.0406	0.0526	0.0495	0.033
14	0.0434	0.0531	0.0408	0.0419	0.0404	0.0347	0.0365	0.0316	0.0464	0.0439	0.0443	0.0351	0.0423	0.0554	0.0506	0.0336
16	0.0454	0.0548	0.042	0.0426	0.042	0.036	0.037	0.0322	0.0462	0.0439	0.0453	0.0364	0.0441	0.0592	0.0519	0.0344
18	0.0474	0.0569	0.0434	0.0435	0.0433	0.0371	0.0377	0.0325	0.0428	0.0413	0.0451	0.037	0.0462	0.063	0.0537	0.0354
26	0.0497	0.057	0.0336	0.0563	0.0362	0.0302	0.0346	0.0359	0.0339	0.0332	0.0725	0.0861	0.0496	0.0681	0.087	0.0605
28	0.0498	0.0608	0.0498	0.0493	0.0352	0.0301	0.0388	0.0289	0.034	0.0332	0.0357	0.0298	0.0493	0.0721	0.0637	0.0395
30	0.0512	0.0641	0.0515	0.0538	0.0342	0.0297	0.0389	0.0297	0.0334	0.0335	0.0359	0.0297	0.05	0.0757	0.067	0.0458
32	0.0522	0.0655	0.0521	0.0552	0.0321	0.0277	0.04	0.0303	0.0326	0.0327	0.0357	0.0296	0.0505	0.0767	0.0686	0.0486
34	0.0525	0.0645	0.0539	0.0562	0.0291	0.0239	0.0419	0.0304	0.0319	0.0316	0.0349	0.029	0.0512	0.0759	0.0688	0.0493
36	0.0538	0.0641	0.0558	0.0556	0.0274	0.0225	0.0382	0.0294	0.0316	0.0307	0.0341	0.0283	0.0521	0.075	0.0694	0.05
38	0.0553	0.0647	0.0558	0.0546	0.0267	0.022	0.0349	0.0278	0.0308	0.0301	0.0339	0.0276	0.0536	0.0766	0.069	0.0496
40	0.0572	0.0661	0.0556	0.0544	0.0257	0.0212	0.0321	0.0269	0.03	0.0295	0.0334	0.0268	0.055	0.0785	0.0691	0.0489
42	0.0588	0.0676	0.0554	0.0541	0.025	0.0205	0.0302	0.026	0.0288	0.0289	0.0325	0.0263	0.056	0.0805	0.0694	0.0492
44	0.0605	0.0691	0.0558	0.0543	0.024	0.0195	0.0288	0.0253	0.0278	0.0279	0.0316	0.0251	0.0572	0.0821	0.0701	0.0497
46	0.0621	0.0708	0.0567	0.0549	0.0233	0.0189	0.0278	0.0245	0.0264	0.0272	0.0305	0.0239	0.058	0.0838	0.0713	0.05
48	0.0634	0.0723	0.0574	0.0556	0.0225	0.0182	0.0269	0.0239	0.0252	0.026	0.029	0.023	0.0585	0.0856	0.0722	0.0507
50	0.0644	0.0736	0.0583	0.0559	0.0218	0.0176	0.0261	0.0232	0.0239	0.025	0.0279	0.0217	0.0594	0.0865	0.0728	0.0514
52	0.0651	0.0744	0.0592	0.0567	0.0212	0.0169	0.0256	0.022	0.0228	0.0238	0.0271	0.0208	0.0599	0.0884	0.0739	0.0521
54	0.0653	0.0757	0.0601	0.0573	0.0205	0.0165	0.0251	0.0211	0.022	0.0228	0.0263	0.0201	0.0601	0.0892	0.0749	0.0526
56	0.0652	0.0769	0.061	0.0579	0.0201	0.0162	0.0245	0.0202	0.0213	0.022	0.0255	0.0198	0.0606	0.0898	0.0759	0.0533
58	0.065	0.078	0.062	0.0587	0.0197	0.016	0.0238	0.0199	0.0205	0.0214	0.025	0.0189	0.0637	0.0907	0.0771	0.0539
60	0.0647	0.0786	0.0628	0.0593	0.0191	0.0154	0.023	0.0191	0.0199	0.0206	0.0243	0.0186	0.0648	0.0911	0.0784	0.0544
62	0.0638	0.0789	0.0639	0.06	0.0187	0.015	0.0224	0.0186	0.0194	0.0202	0.0238	0.0181	0.0644	0.0906	0.0792	0.0547
64	0.0636	0.0794	0.0649	0.0607	0.0183	0.0147	0.0218	0.018	0.0187	0.0196	0.0231	0.0177	0.0621	0.0915	0.0802	0.0554
66	0.063	0.0796	0.0657	0.0616	0.0182	0.0146	0.0211	0.0178	0.0182	0.0193	0.0226	0.0175	0.0604	0.0908	0.0813	0.0559
68	0.0628	0.08	0.0667	0.0623	0.0176	0.0145	0.0205	0.017	0.0179	0.0186	0.0221	0.0171	0.0597	0.0915	0.0824	0.0565
70	0.0625	0.0803	0.0674	0.0631	0.0174	0.0141	0.0199	0.0164	0.0175	0.0182	0.0214	0.0167	0.0592	0.0911	0.0833	0.0568
72	0.062	0.0804	0.0682	0.0637	0.0174	0.0142	0.0194	0.0161	0.0172	0.018	0.021	0.0162	0.0587	0.0915	0.0846	0.0575
74	0.0615	0.0803	0.0691	0.0645	0.0171	0.014	0.019	0.0156	0.0168	0.0175	0.0205	0.0158	0.0582	0.0909	0.0856	0.0579
76	0.0617	0.0806	0.07	0.0651	0.0171	0.0155	0.0185	0.015	0.0164	0.0176	0.0201	0.0155	0.0579	0.0911	0.0865	0.0587
78	0.0612	0.0805	0.0707	0.0661	0.0167	0.0133	0.0179	0.0147	0.0162	0.0171	0.0195	0.015	0.0576	0.0907	0.0875	0.0589
80	0.0612	0.08	0.0714	0.0663	0.0166	0.0134	0.0176	0.0142	0.0162	0.0169	0.0191	0.0149	0.0571	0.0897	0.0884	0.059
82	0.061	0.08	0.0721	0.0673	0.0167	0.0133	0.0172	0.0138	0.0158	0.0168	0.0188	0.0149	0.0568	0.0891	0.0893	0.0596
84	0.0608	0.0799	0.0727	0.0678	0.0166	0.0134	0.0169	0.0135	0.0157	0.0166	0.0185	0.0145	0.0564	0.0882	0.0902	0.0599
86	0.061	0.0793	0.0735	0.0687	0.0165	0.0131	0.0169	0.0133	0.0154	0.0163	0.0182	0.0143	0.0558	0.088	0.0912	0.0604
88	0.0611	0.0799	0.0743	0.0692	0.0164	0.0133	0.0166	0.013	0.0154	0.0161	0.0181	0.0141	0.055	0.088	0.0919	0.0608
90	0.0608	0.0795	0.0748	0.0699	0.0162	0.0129	0.0166	0.0127	0.0152	0.016	0.0178	0.0137	0.0556	0.0875	0.0927	0.0609
