# Supplementary material for: Dominant Vibrio cholerae phage exhibits lysis inhibition sensitive to disruption by a defensive phage satellite
Source: eLife. 2020 Apr 24;9:e53200. doi: 10.7554/eLife.53200 (PMC7182436; doi:10.7554/eLife.53200)
Supplement: Figure 3—source data 1. [file elife-53200-fig3-data1.xlsx]

## Sheet: Sheet1
Time (minutes)	Empty Vector Infection				ArrA Complemented Infection				Empty Vector Infection + DNP				ArrA Complemented Infection + DNP
0	0.0874	0.0783	0.0762	0.0625	0.0772	0.072	0.0651	0.0829	0.0829	0.0751	0.0732	0.0601	0.0745	0.0666	0.0619	0.0783
2	0.0837	0.075	0.0732	0.0605	0.0733	0.0687	0.0622	0.0774	0.0805	0.0699	0.0688	0.0568	0.0731	0.0634	0.0609	0.0746
4	0.0829	0.0744	0.0718	0.0589	0.0723	0.0679	0.0616	0.0752	0.0815	0.0726	0.0686	0.0562	0.0716	0.0609	0.0593	0.073
6	0.0825	0.0741	0.0712	0.0585	0.0714	0.0683	0.0613	0.075	0.0814	0.0726	0.068	0.0567	0.0717	0.0615	0.0591	0.0726
8	0.0835	0.0761	0.0722	0.0592	0.0729	0.0696	0.0612	0.0761	0.083	0.074	0.0691	0.0577	0.0724	0.0622	0.0587	0.0736
10	0.0864	0.0791	0.0758	0.0627	0.0755	0.0744	0.0656	0.0813	0.0883	0.0792	0.0746	0.0614	0.0749	0.065	0.0602	0.0761
12	0.0897	0.0813	0.0785	0.0646	0.0775	0.0749	0.0651	0.0813	0.0894	0.0796	0.0746	0.0633	0.0815	0.0697	0.0615	0.0785
14	0.0934	0.0838	0.0808	0.0683	0.0804	0.0776	0.0678	0.0829	0.094	0.0824	0.0773	0.0673	0.082	0.0706	0.0642	0.0805
16	0.0964	0.0869	0.0827	0.0719	0.0819	0.08	0.0714	0.0846	0.0972	0.0852	0.0799	0.0704	0.0844	0.0739	0.0676	0.0826
18	0.0998	0.0909	0.0848	0.0749	0.0839	0.0825	0.0753	0.0873	0.101	0.0892	0.0821	0.0738	0.0872	0.0767	0.0717	0.0856
20	0.1035	0.0944	0.0883	0.0772	0.0864	0.0857	0.0795	0.0903	0.1046	0.0938	0.085	0.0765	0.0898	0.0791	0.0751	0.0896
22	0.1076	0.0985	0.0922	0.0797	0.0895	0.0891	0.0818	0.0943	0.1094	0.0976	0.0885	0.0791	0.0934	0.0829	0.0769	0.0934
24	0.1121	0.1026	0.0959	0.0793	0.0936	0.0927	0.0835	0.0992	0.1138	0.1025	0.0923	0.0782	0.098	0.0859	0.0786	0.0983
26	0.1168	0.1073	0.1006	0.0763	0.0986	0.0964	0.0862	0.104	0.1184	0.1081	0.0976	0.075	0.1029	0.091	0.0816	0.1028
28	0.1219	0.1117	0.1047	0.091	0.1031	0.1014	0.0895	0.1074	0.1243	0.1131	0.1027	0.0898	0.1069	0.0959	0.0847	0.1058
30	0.1262	0.1161	0.1079	0.0936	0.1067	0.1046	0.093	0.1112	0.1294	0.118	0.1071	0.0925	0.1104	0.0993	0.0881	0.1094
32	0.13	0.1202	0.1107	0.0883	0.1103	0.1075	0.096	0.1158	0.1335	0.1233	0.1102	0.0877	0.1135	0.1027	0.0914	0.1136
34	0.1334	0.1228	0.1133	0.1024	0.1131	0.1114	0.099	0.122	0.1369	0.1254	0.1125	0.101	0.1167	0.1053	0.0941	0.1189
36	0.1367	0.126	0.1171	0.1044	0.1169	0.1144	0.1024	0.1281	0.1411	0.1278	0.116	0.1017	0.1207	0.1065	0.0965	0.125
38	0.141	0.1306	0.121	0.1076	0.122	0.1172	0.1061	0.1332	0.1438	0.13	0.1199	0.1059	0.1263	0.1097	0.0994	0.129
40	0.1444	0.1362	0.1247	0.1115	0.1243	0.1219	0.1096	0.1356	0.1468	0.1337	0.1234	0.1097	0.13	0.1139	0.1073	0.131
42	0.1485	0.1404	0.129	0.1151	0.1274	0.1263	0.1134	0.1381	0.1515	0.1375	0.1294	0.112	0.1343	0.1165	0.1033	0.1334
44	0.1525	0.1438	0.1324	0.1192	0.1295	0.1274	0.1149	0.1396	0.1553	0.1395	0.1342	0.1157	0.1387	0.1189	0.1028	0.1355
46	0.1541	0.1451	0.133	0.1179	0.1299	0.1283	0.1159	0.1396	0.1564	0.1392	0.1395	0.114	0.1425	0.1209	0.1013	0.1355
48	0.1535	0.1421	0.1314	0.1173	0.1278	0.1251	0.117	0.1343	0.1546	0.1356	0.142	0.1132	0.1441	0.122	0.1025	0.1302
50	0.1487	0.1362	0.125	0.1128	0.1244	0.1229	0.1125	0.1308	0.1485	0.1288	0.1396	0.1082	0.1432	0.1208	0.0961	0.1274
52	0.1395	0.1274	0.1156	0.1027	0.1203	0.1192	0.109	0.1256	0.1396	0.1176	0.1328	0.0965	0.1387	0.1174	0.0943	0.1233
54	0.1282	0.117	0.1049	0.0926	0.1192	0.1163	0.1078	0.1225	0.1285	0.1072	0.1238	0.0847	0.1341	0.1145	0.094	0.1197
56	0.116	0.1059	0.0946	0.0816	0.118	0.1152	0.1059	0.1203	0.1163	0.0967	0.1139	0.0729	0.1307	0.1147	0.0941	0.1178
58	0.1025	0.0938	0.0839	0.0708	0.1173	0.1144	0.1052	0.1191	0.1043	0.085	0.1024	0.0618	0.1284	0.1119	0.0936	0.1169
60	0.0892	0.0797	0.0717	0.0594	0.1158	0.1139	0.1045	0.117	0.0904	0.0709	0.0903	0.0524	0.127	0.1116	0.0933	0.1155
62	0.075	0.0646	0.0586	0.0498	0.1139	0.1129	0.1045	0.1152	0.0761	0.0573	0.0757	0.044	0.1249	0.1103	0.0922	0.113
64	0.0613	0.0523	0.047	0.0409	0.1112	0.112	0.1036	0.1119	0.0619	0.0477	0.06	0.0358	0.1227	0.1082	0.0911	0.1102
66	0.0514	0.0444	0.0392	0.0345	0.1081	0.1099	0.1026	0.1091	0.0516	0.0422	0.048	0.0312	0.1197	0.1069	0.0892	0.1066
68	0.044	0.0402	0.0346	0.0288	0.1048	0.1067	0.1005	0.1056	0.0449	0.038	0.0409	0.0261	0.1161	0.1034	0.087	0.1032
70	0.0384	0.0366	0.0317	0.0276	0.1014	0.103	0.0974	0.1002	0.0389	0.0346	0.0361	0.0253	0.1132	0.1015	0.0848	0.0989
72	0.0339	0.0333	0.0285	0.0252	0.096	0.0992	0.0942	0.0963	0.034	0.0318	0.0325	0.023	0.1099	0.0981	0.0818	0.0945
82	0.0236	0.0266	0.0204	0.019	0.0725	0.0744	0.0705	0.0729	0.0214	0.0235	0.0218	0.0158	0.0328	0.027	0.0257	0.0303
84	0.0222	0.0256	0.0194	0.0183	0.0673	0.07	0.0665	0.0685	0.0204	0.0228	0.0208	0.0155	0.0298	0.0241	0.0225	0.0262
86	0.0211	0.0249	0.0186	0.0171	0.0634	0.0661	0.0628	0.0642	0.0193	0.0229	0.02	0.0149	0.0277	0.0229	0.0222	0.024
88	0.0203	0.0247	0.018	0.0169	0.059	0.0624	0.0592	0.0603	0.0186	0.0239	0.0194	0.0147	0.0254	0.0211	0.0214	0.0228
90	0.0198	0.0245	0.0177	0.0166	0.055	0.0588	0.0558	0.0563	0.0178	0.0218	0.0189	0.0144	0.0242	0.0204	0.0208	0.0218
92	0.0193	0.0245	0.0174	0.0165	0.0506	0.0547	0.0526	0.0518	0.0175	0.0199	0.0183	0.0138	0.0231	0.0191	0.0199	0.0214
94	0.0189	0.0245	0.0171	0.0163	0.0464	0.0512	0.0488	0.0478	0.0172	0.019	0.018	0.0134	0.0228	0.0188	0.0196	0.0204
96	0.0185	0.0245	0.0168	0.016	0.0424	0.0466	0.0451	0.0442	0.017	0.0183	0.0178	0.0133	0.0227	0.0186	0.0194	0.0206
98	0.0183	0.0245	0.0166	0.016	0.0388	0.043	0.0416	0.0405	0.0168	0.0176	0.0175	0.0135	0.0222	0.0183	0.0189	0.0202
100	0.0181	0.0246	0.0165	0.0154	0.0356	0.0394	0.0384	0.0374	0.0168	0.0172	0.0177	0.0129	0.0222	0.0181	0.0188	0.0203
102	0.0179	0.0247	0.0164	0.0156	0.0327	0.0361	0.0353	0.0343	0.0167	0.0167	0.0174	0.013	0.022	0.0179	0.0189	0.02
104	0.0175	0.0246	0.0162	0.0153	0.03	0.0335	0.0325	0.0313	0.0167	0.016	0.0172	0.0127	0.0219	0.018	0.0186	0.0199
106	0.0184	0.0255	0.0162	0.0155	0.0277	0.0306	0.0301	0.0293	0.0167	0.0159	0.0172	0.013	0.0218	0.0179	0.0187	0.0197
108	0.0172	0.0254	0.0162	0.0154	0.0258	0.028	0.0281	0.027	0.0167	0.0157	0.0173	0.0128	0.0221	0.0179	0.0186	0.0195
110	0.017	0.0256	0.0161	0.0154	0.0244	0.0258	0.0262	0.0251	0.0166	0.0157	0.0173	0.013	0.0221	0.0177	0.0184	0.0194
112	0.017	0.0257	0.016	0.0155	0.023	0.024	0.0243	0.0229	0.0166	0.0155	0.0173	0.0128	0.022	0.0175	0.0183	0.0182
114	0.0167	0.0261	0.016	0.0155	0.022	0.0226	0.0234	0.0228	0.0167	0.0155	0.0173	0.0132	0.022	0.0176	0.0184	0.0196
116	0.0168	0.0264	0.0158	0.0155	0.0212	0.0216	0.0223	0.0219	0.0167	0.0155	0.0173	0.0129	0.0221	0.0178	0.0184	0.0196
118	0.0167	0.0268	0.0158	0.0154	0.0206	0.0206	0.0215	0.021	0.0166	0.0155	0.0172	0.013	0.0223	0.0175	0.0186	0.0195
