# Supplementary material for: Dominant Vibrio cholerae phage exhibits lysis inhibition sensitive to disruption by a defensive phage satellite
Source: eLife. 2020 Apr 24;9:e53200. doi: 10.7554/eLife.53200 (PMC7182436; doi:10.7554/eLife.53200)
Supplement: Figure 4—source data 1. [file elife-53200-fig4-data1.xlsx]

## Sheet: 4A
Time (minutes)	PLE (-)				PLE 1				Empty Vector Control			LidI PLE 1			PLE 1 lidI Deletion
0	0.0561	0.0399	0.0548	0.048	0.0478	0.039	0.0541	0.0582	0.0614	0.0663	0.0718	0.0635	0.0662	0.0519	0.0607	0.056	0.0514	0.0646
2	0.0542	0.0384	0.055	0.0492	0.047	0.0381	0.0544	0.0589	0.0592	0.0672	0.0681	0.0638	0.0632	0.0529	0.0628	0.0581	0.0508	0.0643
4	0.0516	0.0373	0.0532	0.0471	0.0457	0.0365	0.0528	0.0569	0.0572	0.0676	0.0684	0.0636	0.0627	0.0538	0.0631	0.0582	0.0503	0.0639
6	0.0491	0.0365	0.0506	0.0446	0.0441	0.0351	0.0506	0.0548	0.0558	0.0661	0.0662	0.0619	0.0608	0.0536	0.0616	0.0562	0.0486	0.0618
8	0.0471	0.0353	0.0483	0.0421	0.0424	0.0338	0.0475	0.0522	0.0546	0.0637	0.0633	0.0595	0.0585	0.0519	0.0595	0.0538	0.0458	0.0604
10	0.0448	0.0343	0.0454	0.0396	0.0404	0.0324	0.0451	0.0501	0.0528	0.0611	0.0602	0.0566	0.0558	0.0495	0.057	0.0513	0.0436	0.058
12	0.043	0.0331	0.0434	0.0378	0.0391	0.0316	0.0428	0.048	0.0509	0.0585	0.0576	0.0539	0.0537	0.0475	0.0539	0.0479	0.0411	0.0548
14	0.0415	0.0324	0.0419	0.0364	0.0379	0.0309	0.0409	0.0458	0.0496	0.0568	0.0553	0.0518	0.0519	0.0457	0.0511	0.0455	0.0395	0.0521
16	0.0405	0.0319	0.0402	0.035	0.0371	0.0304	0.0393	0.0442	0.0481	0.0549	0.0539	0.0504	0.0507	0.0441	0.0479	0.0437	0.0379	0.0492
18	0.0398	0.0316	0.0392	0.0338	0.0364	0.0299	0.0382	0.0425	0.0476	0.0536	0.0525	0.0495	0.0498	0.0432	0.0463	0.0419	0.0366	0.0474
20	0.0393	0.0313	0.0382	0.0332	0.0354	0.0291	0.0366	0.0411	0.047	0.0531	0.0518	0.049	0.049	0.0422	0.0444	0.0401	0.0355	0.0454
22	0.0389	0.0312	0.0374	0.0326	0.0264	0.0219	0.0347	0.0391	0.0469	0.0518	0.0511	0.0453	0.0455	0.0398	0.0426	0.0378	0.0347	0.0443
24	0.0388	0.0313	0.037	0.0322	0.0161	0.0122	0.0234	0.0274	0.0467	0.0515	0.0507	0.0354	0.0344	0.0337	0.038	0.0331	0.0333	0.0425
26	0.0386	0.0311	0.0364	0.0321	0.0143	0.0108	0.0164	0.0193	0.0462	0.0504	0.0508	0.0264	0.0254	0.0271	0.0237	0.0194	0.0257	0.0375
28	0.039	0.0311	0.0363	0.0319	0.0132	0.01	0.0141	0.0166	0.0452	0.0496	0.0508	0.0222	0.0213	0.0234	0.0165	0.0128	0.013	0.0246
30	0.039	0.0312	0.0362	0.0316	0.0123	0.0095	0.0127	0.015	0.0442	0.0491	0.0505	0.0197	0.0193	0.0208	0.0136	0.01	0.0102	0.0161
32	0.0392	0.0314	0.0363	0.0317	0.0111	0.0086	0.0114	0.0134	0.0433	0.0487	0.051	0.018	0.0179	0.0187	0.0122	0.0085	0.0094	0.0129
34	0.0396	0.0318	0.036	0.0314	0.0101	0.0081	0.0108	0.0127	0.0427	0.0483	0.0506	0.0166	0.0167	0.0172	0.0112	0.0086	0.0081	0.0114
36	0.0397	0.0319	0.0359	0.0312	0.0091	0.0075	0.0104	0.0122	0.0425	0.0475	0.0503	0.0153	0.0151	0.0159	0.0094	0.0069	0.0073	0.0101
38	0.0397	0.032	0.0361	0.0313	0.0081	0.0068	0.0091	0.0109	0.0425	0.0469	0.0502	0.0145	0.014	0.0146	0.0085	0.0058	0.0066	0.0108
40	0.04	0.032	0.0362	0.0315	0.0073	0.0062	0.0082	0.0098	0.0424	0.0465	0.0503	0.0132	0.0131	0.0138	0.0073	0.0051	0.0059	0.0078
42	0.0403	0.032	0.0362	0.0316	0.006	0.0054	0.0073	0.0087	0.0423	0.0458	0.0502	0.0121	0.0121	0.0127	0.0064	0.0038	0.0048	0.0067
44	0.0402	0.032	0.0362	0.0317	0.0053	0.0048	0.0062	0.0075	0.0418	0.0455	0.0507	0.0109	0.0113	0.0117	0.0056	0.0031	0.0041	0.0076
46	0.0406	0.032	0.0363	0.032	0.0052	0.0047	0.005	0.0059	0.0417	0.0451	0.0506	0.0097	0.0104	0.0109	0.0046	0.0026	0.0034	0.0031
48	0.0407	0.0322	0.0363	0.0318	0.0049	0.0046	0.0045	0.005	0.0415	0.045	0.0506	0.009	0.0093	0.0097	0.0042	0.0026	0.003	0.0035
50	0.0409	0.0322	0.0361	0.0316	0.0049	0.0044	0.0039	0.0041	0.0411	0.0447	0.051	0.0081	0.0086	0.0088	0.0037	0.0023	0.0029	0.0033
52	0.0411	0.032	0.0363	0.0316	0.0047	0.0041	0.0042	0.0043	0.0406	0.0441	0.0511	0.0076	0.0081	0.0083	0.0036	0.0022	0.0029	0.0033
54	0.0415	0.0323	0.0361	0.0316	0.0048	0.0044	0.0039	0.0039	0.0404	0.0443	0.0511	0.007	0.0075	0.0076	0.0036	0.0023	0.0028	0.0032
56	0.0411	0.032	0.0358	0.0315	0.0051	0.0044	0.0035	0.0036	0.0398	0.0432	0.0509	0.0067	0.0073	0.0072	0.0038	0.002	0.0028	0.0032
58	0.0414	0.0322	0.0363	0.0317	0.0049	0.0042	0.003	0.0032	0.0395	0.0428	0.0507	0.0065	0.0072	0.0069	0.0034	0.0024	0.0029	0.0033
60	0.0413	0.0321	0.0354	0.0313	0.0047	0.0042	0.004	0.0042	0.0384	0.042	0.0505	0.0062	0.0069	0.0065	0.0034	0.0022	0.0028	0.0034
62	0.0409	0.0318	0.0353	0.031	0.0049	0.0043	0.0035	0.0037	0.0379	0.0408	0.0499	0.006	0.0069	0.0066	0.0035	0.0022	0.0029	0.0035
64	0.0409	0.0316	0.0349	0.0311	0.0046	0.0041	0.0037	0.0038	0.0368	0.0398	0.0498	0.0057	0.0067	0.0062	0.0035	0.002	0.0029	0.0035
66	0.0403	0.0313	0.0339	0.0302	0.005	0.0043	0.0042	0.004	0.0358	0.0388	0.0486	0.0055	0.0066	0.0061	0.0034	0.0022	0.0029	0.0035
68	0.0396	0.0307	0.0337	0.0299	0.0051	0.0044	0.0036	0.0037	0.0347	0.0373	0.0474	0.0055	0.0066	0.006	0.0034	0.0024	0.0029	0.0036
70	0.0392	0.0307	0.0331	0.0298	0.0051	0.0043	0.0039	0.0038	0.0332	0.0353	0.0463	0.0054	0.0066	0.0057	0.0031	0.002	0.003	0.0036
72	0.038	0.03	0.0321	0.0292	0.0053	0.0046	0.004	0.0041	0.0313	0.0334	0.0447	0.0051	0.0064	0.0057	0.0033	0.0022	0.0031	0.0039
74	0.0365	0.0295	0.031	0.0285	0.0054	0.0045	0.0037	0.0037	0.0293	0.0313	0.0428	0.005	0.0065	0.0056	0.0026	0.0021	0.003	0.0041
76	0.0342	0.0285	0.0295	0.0275	0.0053	0.0046	0.0039	0.0037	0.0269	0.0287	0.0401	0.0049	0.0063	0.0054	0.003	0.0023	0.0031	0.0039
78	0.032	0.0275	0.0274	0.0262	0.0051	0.0044	0.004	0.0038	0.024	0.0261	0.0375	0.0048	0.0059	0.0054	0.0025	0.0023	0.0031	0.004
80	0.029	0.0262	0.0255	0.0252	0.0054	0.0045	0.0039	0.0038	0.0224	0.0238	0.0345	0.005	0.0062	0.0053	0.0017	0.0022	0.0031	0.0039
82	0.0256	0.0242	0.0231	0.0234	0.0052	0.0044	0.0037	0.0036	0.0195	0.0214	0.0309	0.0047	0.0064	0.0053	0.0023	0.0024	0.0033	0.0039
84	0.0224	0.022	0.0208	0.0221	0.0054	0.0045	0.0037	0.0034	0.0176	0.0186	0.0276	0.0048	0.0059	0.0051	0.0022	0.0025	0.0033	0.0039
86	0.0192	0.0196	0.0184	0.0198	0.0054	0.0046	0.0039	0.0037	0.0157	0.017	0.0246	0.0046	0.0064	0.005	0.0021	0.0024	0.0033	0.0042
88	0.0168	0.0174	0.0164	0.0182	0.0058	0.0046	0.0039	0.0036	0.0144	0.0154	0.0215	0.0043	0.0063	0.005	0.0023	0.0023	0.0035	0.0043
90	0.0148	0.0153	0.0145	0.0163	0.0057	0.0047	0.004	0.0036	0.0133	0.0139	0.019	0.0042	0.0064	0.0048	0.0021	0.0028	0.0035	0.0044

## Sheet: 4E
Time (minutes post-infection)	PLE 4								LidI PLE 4				PLE 4 LidI Deletion
0	0.0743	0.084	0.0626	0.0594	0.0703	0.056	0.0577	0.0521	0.0567	0.0664	0.0525	0.0579	0.0642	0.0652	0.0685	0.0688	0.0658	0.0672	0.0772
2	0.069	0.0795	0.0582	0.0616	0.0681	0.054	0.0554	0.0528	0.0604	0.0647	0.0536	0.0575	0.0661	0.0635	0.0662	0.0654	0.0628	0.0646	0.0721
4	0.0664	0.0779	0.0585	0.0596	0.0672	0.0524	0.0539	0.0522	0.0607	0.0653	0.0549	0.0581	0.0647	0.0617	0.0647	0.0633	0.0624	0.0632	0.0726
6	0.0651	0.0732	0.0578	0.0586	0.064	0.0491	0.0504	0.0496	0.0596	0.0642	0.0536	0.0571	0.063	0.0599	0.0638	0.0593	0.0597	0.0601	0.0686
8	0.0628	0.0706	0.0558	0.057	0.0611	0.0463	0.0476	0.0467	0.0588	0.0617	0.0513	0.055	0.0608	0.0583	0.0621	0.0555	0.0562	0.0568	0.0656
10	0.0603	0.0666	0.0635	0.0554	0.0592	0.0442	0.0451	0.0445	0.0574	0.0592	0.0489	0.0529	0.0587	0.0564	0.0597	0.0527	0.054	0.0543	0.0628
12	0.0545	0.0626	0.0512	0.0531	0.0572	0.0424	0.0435	0.0434	0.0557	0.0576	0.0476	0.0513	0.0563	0.055	0.0577	0.0504	0.0521	0.0527	0.06
14	0.0558	0.0616	0.0498	0.0528	0.0564	0.0416	0.0426	0.043	0.0552	0.0566	0.0468	0.0504	0.0545	0.0522	0.0555	0.0491	0.0515	0.0521	0.0595
16	0.0544	0.0596	0.0509	0.0528	0.0567	0.0412	0.0423	0.0427	0.0552	0.0568	0.047	0.0506	0.0551	0.0522	0.0544	0.0492	0.0519	0.0518	0.0595
18	0.0518	0.0598	0.0501	0.0521	0.0561	0.0407	0.0418	0.0424	0.055	0.0557	0.0466	0.0501	0.0531	0.0538	0.0552	0.0494	0.0535	0.0529	0.059
20	0.0442	0.0442	0.0419	0.0462	0.0239	0.0185	0.0169	0.0221	0.0438	0.0436	0.0371	0.04	0.0527	0.0539	0.0554	0.0482	0.052	0.0503	0.0546
22	0.0227	0.0231	0.0197	0.0196	0.0187	0.0136	0.0123	0.0148	0.0269	0.0297	0.0246	0.029	0.0465	0.0508	0.0491	0.0227	0.0309	0.0262	0.0273
24	0.0202	0.0222	0.0175	0.017	0.0168	0.0127	0.0116	0.0143	0.0211	0.0231	0.018	0.0235	0.0274	0.0321	0.0281	0.011	0.0179	0.0158	0.0206
26	0.0188	0.0201	0.0153	0.0166	0.0161	0.0126	0.0113	0.0132	0.0193	0.0205	0.0154	0.0211	0.0205	0.0204	0.0209	0.0099	0.0162	0.0142	0.0192
28	0.0192	0.02	0.0147	0.0162	0.0158	0.0123	0.0112	0.0133	0.0185	0.0193	0.0145	0.0197	0.0192	0.0184	0.0198	0.0095	0.0156	0.0137	0.0197
30	0.0188	0.0203	0.0165	0.0159	0.0155	0.0127	0.0116	0.0138	0.0181	0.0186	0.0138	0.0193	0.0186	0.0177	0.0193	0.0091	0.0151	0.0138	0.018
32	0.0187	0.0208	0.0112	0.013	0.0152	0.0131	0.0118	0.0134	0.0151	0.0183	0.0135	0.0187	0.0184	0.0175	0.0192	0.0089	0.0151	0.0135	0.0186
34	0.0187	0.0199	0.0115	0.0108	0.015	0.0134	0.0121	0.0094	0.0125	0.0182	0.0087	0.0099	0.0182	0.0175	0.019	-0.0001	0.0147	0.013	0.0171
36	0.0159	0.0166	0.0144	0.0133	0.0143	0.0133	0.012	0.014	0.0149	0.0176	0.0125	0.0184	0.018	0.0146	0.0163	0.0086	0.014	0.0126	0.0171
38	0.018	0.0142	0.0166	0.0162	0.0141	0.0137	0.0123	0.0137	0.0176	0.0174	0.0125	0.0182	0.0181	0.0174	0.0188	0.0096	0.0138	0.0125	0.0167
40	0.0195	0.0222	0.0165	0.0159	0.0135	0.0138	0.0123	0.0145	0.0176	0.0169	0.0122	0.0173	0.0177	0.0175	0.0186	0.0079	0.0132	0.017	0.0198
42	0.0176	0.0195	0.017	0.0156	0.0164	0.0137	0.0125	0.0138	0.0175	0.0167	0.012	0.0171	0.0175	0.0173	0.0187	0.0148	0.0126	0.0117	0.0159
44	0.017	0.0189	0.0177	0.0161	0.0124	0.0138	0.0124	0.0105	0.0178	0.0161	0.0079	0.0163	0.0173	0.0119	0.0144	0.0074	0.0123	0.0115	0.0151
46	0.0194	0.0193	0.0159	0.0156	0.0116	0.0138	0.0115	0.0139	0.0173	0.0145	0.0113	0.0158	0.017	0.0175	0.0185	0.0075	0.0119	0.0112	0.0148
48	0.0204	0.0179	0.0132	0.0149	0.0112	0.0139	0.0128	0.0146	0.0169	0.0153	0.011	0.0153	0.0167	0.0173	0.0176	0.0074	0.0116	0.011	0.014
50	0.0157	0.0177	0.0141	0.0139	0.0108	0.0134	0.0131	0.0138	0.0161	0.0147	0.0106	0.0148	0.0161	0.0173	0.0131	0.0074	0.0111	0.0109	0.0134
52	0.0187	0.0175	0.0135	0.0154	0.0103	0.0132	0.0128	0.014	0.0175	0.0145	0.0101	0.0143	0.016	0.0172	0.0128	0.0075	0.0108	0.011	0.0137
54	0.0185	0.0181	0.0218	0.0152	0.01	0.013	0.0131	0.0139	0.0176	0.0139	0.0097	0.014	0.0155	0.0175	0.0179	0.0077	0.0106	0.0111	0.0136
56	0.0144	0.0172	0.0133	0.0158	0.01	0.0128	0.0136	0.0144	0.0183	0.0136	0.0095	0.0131	0.0154	0.0174	0.018	0.0076	0.0105	0.011	0.0135
58	0.0167	0.018	0.0153	0.0146	0.0095	0.0126	0.0136	0.014	0.0174	0.0131	0.0091	0.013	0.0153	0.0124	0.0176	0.008	0.0105	0.0113	0.0136
60	0.0176	0.0169	0.0162	-0.002	0.0096	0.0123	0.0139	0.0145	0.0008	0.0133	0.0089	0.0121	0.0149	0.0175	0.0179	0.0079	0.0102	0.0116	0.0136
62	0.0135	0.0178	0.0143	0.0153	0.0092	0.0121	0.0143	0.0143	0.0182	0.0125	0.0085	0.0121	0.0151	0.0135	0.0179	0.0083	0.0103	0.0117	0.0135
64	0.014	0.0169	0.0143	0.0149	0.0092	0.0118	0.0147	0.0144	0.0176	0.0122	0.0084	0.0115	0.0072	0.0122	0.0175	0.0085	0.0104	0.012	0.0135
66	0.0133	0.0165	0.0138	0.0129	0.0088	0.0117	0.0153	0.0145	0.0159	0.0122	0.0083	0.0109	0.0148	0.0144	0.0131	0.0087	0.0104	0.0125	0.0138
68	0.0133	0.0146	0.0155	0.0167	0.0087	0.0118	0.0153	0.0151	0.0196	0.0115	0.0083	0.0105	0.0155	0.0129	0.0132	0.0089	0.0106	0.0128	0.0138
70	0.0132	0.0159	0.0155	0.0173	0.0087	0.0121	0.0165	0.0151	0.0188	0.012	0.0079	0.0107	0.0133	0.0188	0.0141	0.0093	0.0107	0.0131	0.0139
72	0.0132	0.0169	0.0155	0.0179	0.0086	0.0124	0.0172	0.015	0.0209	0.0118	0.0078	0.0105	0.0148	0.019	0.0186	0.0097	0.0109	0.0136	0.0144
74	0.0131	0.0172	0.0173	0.0185	0.0084	0.0123	0.0177	0.0159	0.0211	0.0117	0.0081	0.0103	0.0149	0.0153	0.0135	0.0099	0.0111	0.0142	0.0144
76	0.0132	0.0173	0.0176	0.0194	0.0086	0.0128	0.019	0.0161	0.0218	0.0118	0.0077	0.01	0.0152	0.0142	0.0192	0.0103	0.0112	0.0148	0.0146
78	0.013	0.0176	0.0174	0.0201	0.0088	0.0127	0.0201	0.0163	0.0224	0.0117	0.0074	0.01	0.0154	0.0192	0.0193	0.011	0.0116	0.0157	0.015
80	0.0131	0.0176	0.0177	0.0248	0.0114	0.0194	0.021	0.017	0.0227	0.012	0.0078	0.0101	0.0155	0.0178	0.0197	0.0114	0.0122	0.0161	0.0155
82	0.0129	0.0178	0.0189	0.0194	0.009	0.013	0.0222	0.0184	0.0233	0.012	0.0078	0.0099	0.0156	0.0165	0.02	0.0121	0.0126	0.0171	0.0158
84	0.013	0.0178	0.0193	0.0197	0.0091	0.0136	0.0235	0.0217	0.024	0.012	0.008	0.0098	0.0159	0.0173	0.0204	0.0126	0.0131	0.018	0.0163
86	0.0128	0.0178	0.0189	0.0219	0.0093	0.0135	0.0252	0.0187	0.0245	0.012	0.0078	0.0101	0.0161	0.0228	0.0209	0.0179	0.0135	0.0189	0.0169
88	0.0128	0.0183	0.0198	0.0208	0.0094	0.0141	0.0267	0.0193	0.0255	0.0121	0.0078	0.0098	0.0166	0.0234	0.0215	0.0139	0.0148	0.0201	0.0174
90	0.0128	0.0187	0.0202	0.0216	0.0098	0.0145	0.0285	0.02	0.0263	0.0123	0.0078	0.0095	0.0169	0.0237	0.022	0.0149	0.0146	0.0212	0.0184
