# Supplementary material for: Dominant Vibrio cholerae phage exhibits lysis inhibition sensitive to disruption by a defensive phage satellite
Source: eLife. 2020 Apr 24;9:e53200. doi: 10.7554/eLife.53200 (PMC7182436; doi:10.7554/eLife.53200)
Supplement: Figure 5—source data 1. [file elife-53200-fig5-data1.xlsx]

## Sheet: 5A
	MOI 0.005						MOI 0.05						MOI 0.5						MOI 5
Time (min)	LidI PLE 1			Empty Vector Control			LidI PLE 1			Empty Vector Control			LidI PLE 1			Empty Vector Control			LidI PLE 1			Empty Vector Control
0	0.0678	0.0649	0.0643	0.0671	0.0709	0.0701	0.0679	0.066	0.0644	0.0668	0.0711	0.0704	0.0691	0.0661	0.0651	0.0653	0.0714	0.0724	0.0692	0.0684	0.0662	0.0681	0.0737	0.0771
2	0.0627	0.0612	0.061	0.0603	0.0663	0.0652	0.0621	0.0621	0.0611	0.0599	0.0669	0.0653	0.0635	0.062	0.0621	0.0603	0.0667	0.0661	0.07	0.0668	0.0659	0.0659	0.0725	0.0745
4	0.0601	0.0591	0.0594	0.0578	0.0648	0.0626	0.0596	0.0602	0.0592	0.0578	0.0647	0.0627	0.0615	0.0604	0.0609	0.0595	0.0656	0.0643	0.0701	0.0682	0.0663	0.067	0.0729	0.0749
6	0.0596	0.059	0.0595	0.0572	0.0642	0.0621	0.059	0.0596	0.0589	0.0575	0.0637	0.0621	0.0605	0.0598	0.0604	0.0586	0.0645	0.0636	0.0704	0.0681	0.0672	0.0668	0.0711	0.0739
8	0.0605	0.0596	0.0597	0.0579	0.0637	0.062	0.0592	0.0599	0.0592	0.0581	0.0629	0.0623	0.0598	0.0592	0.0596	0.058	0.0633	0.0629	0.0696	0.0662	0.0664	0.065	0.07	0.0724
10	0.0622	0.0605	0.0613	0.0585	0.0636	0.0618	0.0607	0.0606	0.0604	0.0581	0.0627	0.063	0.06	0.0586	0.0592	0.0572	0.0624	0.0621	0.0689	0.0636	0.0643	0.0622	0.0694	0.071
12	0.0635	0.0611	0.0631	0.0589	0.0631	0.0618	0.062	0.0605	0.0618	0.0586	0.0624	0.0631	0.0597	0.0571	0.0591	0.0563	0.0607	0.0608	0.0674	0.0611	0.062	0.06	0.0683	0.069
14	0.0645	0.0627	0.0649	0.0597	0.0643	0.0633	0.0622	0.0617	0.0629	0.0596	0.0631	0.0638	0.0589	0.0564	0.0585	0.056	0.0601	0.06	0.0654	0.0592	0.0601	0.0586	0.0665	0.0676
16	0.066	0.0649	0.0666	0.0617	0.0666	0.0652	0.0637	0.0634	0.0644	0.0612	0.0651	0.0653	0.0584	0.0557	0.0579	0.0557	0.0597	0.0596	0.0636	0.057	0.0583	0.0571	0.0646	0.0654
18	0.0697	0.0677	0.0687	0.0645	0.0699	0.0683	0.0666	0.0658	0.0661	0.0641	0.0678	0.068	0.059	0.0558	0.0581	0.0562	0.0599	0.0599	0.0622	0.0557	0.0568	0.0561	0.063	0.0641
20	0.0743	0.0715	0.0715	0.0686	0.074	0.0718	0.0701	0.0686	0.0684	0.0675	0.0712	0.0706	0.0594	0.0562	0.058	0.057	0.0606	0.0605	0.0601	0.0548	0.0557	0.0556	0.0616	0.0622
22	0.0798	0.0762	0.0755	0.0723	0.0786	0.076	0.0741	0.0716	0.0709	0.0709	0.0749	0.0736	0.0585	0.0547	0.056	0.0568	0.0603	0.0602	0.0587	0.0525	0.0534	0.0548	0.0607	0.061
24	0.0864	0.0817	0.0796	0.0773	0.0843	0.081	0.0768	0.0743	0.0729	0.074	0.0784	0.0763	0.0508	0.0488	0.0483	0.0528	0.0562	0.0567	0.0529	0.0458	0.0451	0.0546	0.0597	0.0603
26	0.0921	0.0875	0.0842	0.0817	0.0894	0.0858	0.079	0.0772	0.0759	0.0777	0.0825	0.0786	0.0425	0.0406	0.0407	0.0478	0.0508	0.0507	0.0457	0.0365	0.0356	0.0543	0.0585	0.0589
28	0.0991	0.0931	0.0888	0.0869	0.0961	0.0916	0.0805	0.0771	0.0761	0.0787	0.0862	0.0804	0.0374	0.0351	0.0361	0.0452	0.0478	0.048	0.0406	0.0305	0.0303	0.0538	0.0572	0.0577
30	0.1039	0.0975	0.0934	0.0929	0.1001	0.0972	0.0801	0.077	0.0757	0.0795	0.0869	0.0809	0.0338	0.0315	0.0332	0.0447	0.0473	0.0471	0.0368	0.027	0.027	0.0536	0.0563	0.0571
32	0.107	0.0997	0.0977	0.0976	0.1042	0.1001	0.0791	0.0755	0.074	0.0803	0.0868	0.0805	0.0314	0.0287	0.0304	0.0445	0.0471	0.0472	0.0337	0.0243	0.0241	0.053	0.0554	0.0563
34	0.1102	0.1025	0.101	0.1011	0.1089	0.1039	0.077	0.0733	0.0728	0.0803	0.0856	0.0789	0.0296	0.0268	0.0289	0.0447	0.0473	0.0468	0.0313	0.0222	0.0218	0.0527	0.0546	0.0555
36	0.1143	0.1056	0.1049	0.1048	0.1144	0.1082	0.0757	0.0719	0.0717	0.08	0.0848	0.0782	0.0278	0.0254	0.0278	0.0449	0.0473	0.0472	0.0289	0.0204	0.0201	0.0519	0.0538	0.0548
38	0.1207	0.1108	0.1097	0.1097	0.1212	0.1148	0.0751	0.0712	0.0715	0.0805	0.085	0.0782	0.0263	0.0242	0.0264	0.0452	0.0478	0.0477	0.0266	0.0187	0.0187	0.0514	0.053	0.054
40	0.1276	0.1165	0.1141	0.116	0.1278	0.1207	0.0695	0.0684	0.0663	0.0808	0.0857	0.0783	0.0233	0.0224	0.0236	0.0457	0.0483	0.048	0.0248	0.0175	0.0178	0.0504	0.0524	0.0531
42	0.1284	0.1193	0.1147	0.1197	0.131	0.1238	0.0465	0.0547	0.0473	0.0779	0.0824	0.0772	0.0183	0.0188	0.0196	0.0463	0.0488	0.0487	0.0229	0.0161	0.0166	0.0498	0.0517	0.0525
44	0.1238	0.1183	0.1122	0.1194	0.1307	0.1246	0.0243	0.0336	0.0286	0.07	0.0733	0.0711	0.0153	0.0163	0.0172	0.0464	0.0492	0.0493	0.0212	0.0151	0.015	0.0493	0.0508	0.0517
46	0.1148	0.1158	0.1074	0.1177	0.1301	0.1256	0.0164	0.0222	0.021	0.0648	0.0679	0.0644	0.0135	0.0145	0.0154	0.0468	0.0498	0.0492	0.02	0.0139	0.0136	0.0489	0.0504	0.0508
48	0.1042	0.1097	0.0998	0.1153	0.1266	0.1223	0.0139	0.018	0.0183	0.0645	0.067	0.0633	0.0122	0.0132	0.014	0.0468	0.0502	0.0496	0.0187	0.0127	0.0121	0.0484	0.0494	0.0502
50	0.0965	0.1031	0.0942	0.1123	0.1224	0.1191	0.0126	0.0167	0.0169	0.0648	0.0679	0.0633	0.0109	0.0124	0.0128	0.0464	0.0497	0.0494	0.0171	0.0118	0.0107	0.0478	0.0487	0.0495
52	0.0921	0.0986	0.0909	0.112	0.1192	0.1171	0.012	0.0156	0.0164	0.0653	0.0685	0.0639	0.01	0.0115	0.0118	0.0463	0.0493	0.0493	0.0157	0.0105	0.0093	0.0475	0.0483	0.0491
54	0.0904	0.0956	0.089	0.1122	0.1186	0.1162	0.0115	0.0151	0.0154	0.065	0.0682	0.0635	0.0089	0.0106	0.011	0.0454	0.049	0.0488	0.0143	0.0094	0.0086	0.0468	0.0475	0.0483
56	0.0851	0.0937	0.0828	0.1129	0.1177	0.1163	0.0109	0.0144	0.0145	0.0648	0.0677	0.0624	0.0083	0.0101	0.0105	0.0443	0.0481	0.0482	0.0126	0.0088	0.008	0.0462	0.047	0.0478
58	0.0633	0.0813	0.0624	0.1126	0.1171	0.1162	0.01	0.0137	0.0137	0.0632	0.0668	0.0612	0.0077	0.0096	0.0098	0.043	0.0468	0.0469	0.0112	0.0081	0.0074	0.0454	0.0467	0.0469
60	0.0427	0.055	0.0435	0.1122	0.1165	0.1165	0.0094	0.0127	0.0129	0.0615	0.0655	0.0592	0.0072	0.0088	0.0097	0.0415	0.0453	0.0454	0.0094	0.0073	0.0072	0.0444	0.0457	0.0462
62	0.0329	0.0405	0.0352	0.1097	0.1137	0.1149	0.0091	0.0125	0.0127	0.0595	0.0632	0.0574	0.0071	0.0084	0.0094	0.0397	0.0437	0.0444	0.0085	0.0071	0.0069	0.043	0.045	0.0453
64	0.0281	0.0337	0.0312	0.1067	0.1104	0.1125	0.0086	0.0122	0.0121	0.0573	0.0608	0.0549	0.0067	0.0082	0.0089	0.0384	0.0419	0.0426	0.0075	0.007	0.0065	0.0416	0.0437	0.044
66	0.0246	0.0305	0.0284	0.1041	0.1018	0.109	0.0084	0.012	0.0117	0.0546	0.0579	0.0526	0.0064	0.0082	0.0086	0.0366	0.0398	0.0409	0.0065	0.0068	0.0062	0.0397	0.0424	0.0426
68	0.0223	0.0285	0.0258	0.1	0.0987	0.1037	0.0083	0.012	0.0115	0.0517	0.0548	0.0499	0.0064	0.0082	0.0085	0.0349	0.0382	0.0392	0.0061	0.007	0.006	0.0375	0.0409	0.0413
70	0.02	0.026	0.0237	0.091	0.082	0.0961	0.0084	0.0113	0.0112	0.0492	0.0513	0.0471	0.0064	0.0076	0.0082	0.0329	0.0358	0.0373	0.0059	0.0065	0.0059	0.0351	0.0389	0.0389
72	0.0179	0.0238	0.0219	0.0758	0.064	0.081	0.0083	0.0109	0.0108	0.0458	0.0483	0.0441	0.0061	0.0073	0.008	0.0303	0.0338	0.0349	0.0055	0.0061	0.0059	0.0315	0.0368	0.0363
74	0.0162	0.0215	0.0205	0.0564	0.0484	0.0618	0.0082	0.0109	0.0106	0.043	0.0448	0.0418	0.0061	0.0071	0.0079	0.0285	0.0314	0.0334	0.0054	0.0061	0.006	0.0287	0.0346	0.0339
76	0.0152	0.0198	0.0192	0.0429	0.0383	0.047	0.0081	0.0106	0.0102	0.0402	0.0417	0.0388	0.0059	0.007	0.0076	0.0265	0.0292	0.0311	0.0052	0.0062	0.0055	0.0258	0.0316	0.0313
78	0.0143	0.0184	0.0181	0.0343	0.0316	0.038	0.0079	0.0103	0.0099	0.0375	0.0386	0.0358	0.0058	0.0067	0.0074	0.0244	0.0269	0.0288	0.0051	0.0059	0.0053	0.0229	0.029	0.0286
80	0.0138	0.0178	0.0179	0.0293	0.0269	0.0326	0.0078	0.0102	0.0098	0.0347	0.0357	0.0337	0.0057	0.0067	0.0074	0.0224	0.025	0.0273	0.0049	0.006	0.0054	0.0204	0.0264	0.0268
82	0.0133	0.017	0.0171	0.0256	0.024	0.0287	0.0078	0.0103	0.0095	0.0321	0.0326	0.031	0.0057	0.0066	0.0071	0.0204	0.023	0.0253	0.005	0.0059	0.0052	0.0182	0.0241	0.0242
84	0.0133	0.0165	0.0167	0.0233	0.0222	0.0258	0.0078	0.0101	0.0095	0.0293	0.03	0.0284	0.0057	0.0065	0.0071	0.0188	0.0212	0.0233	0.0049	0.006	0.0052	0.0165	0.0221	0.0224
86	0.013	0.0164	0.0164	0.0219	0.0209	0.0242	0.0076	0.0101	0.0093	0.0271	0.0274	0.0265	0.0057	0.0066	0.0069	0.0173	0.0196	0.022	0.0049	0.0061	0.0053	0.0152	0.0206	0.0213
88	0.0128	0.016	0.016	0.0209	0.0203	0.023	0.0077	0.0099	0.0093	0.025	0.0257	0.0246	0.0057	0.0063	0.0069	0.0161	0.0185	0.0204	0.0049	0.0058	0.0052	0.0138	0.0191	0.0199
90	0.0125	0.0156	0.0155	0.0202	0.0199	0.0219	0.0076	0.0098	0.0091	0.0234	0.0237	0.0227	0.0054	0.0062	0.0066	0.015	0.0174	0.019	0.0046	0.0057	0.0051	0.0131	0.0177	0.0187

## Sheet: 5B
EOP
0.804348
0.707692
1.1017
