# Supplementary material for: Dominant Vibrio cholerae phage exhibits lysis inhibition sensitive to disruption by a defensive phage satellite
Source: eLife. 2020 Apr 24;9:e53200. doi: 10.7554/eLife.53200 (PMC7182436; doi:10.7554/eLife.53200)
Supplement: Figure 6—figure supplement 1—source data 1. [file elife-53200-fig6-figsupp1-data1.xlsx]

## Sheet: 6ABC
MOI 0.001								MOI 0.0001								MOI 0.00001
Empty Vector				LidI				Empty Vector				LidI				Empty Vector				LidI
0.0547	0.0725	0.0654	0.0655	0.069	0.0633	0.0666	0.0643	0.0482	0.0668	0.0615	0.0634	0.0651	0.0628	0.0631	0.0588	0.0547	0.067	0.0598	0.0665	0.0656	0.0618	0.0665	0.0603
0.0497	0.0657	0.0603	0.0612	0.0639	0.0599	0.0623	0.0605	0.0441	0.0609	0.0573	0.0586	0.0617	0.0594	0.0603	0.0564	0.0512	0.0617	0.0572	0.0616	0.0621	0.0592	0.0621	0.0572
0.0476	0.0626	0.057	0.0582	0.0616	0.0574	0.0599	0.0586	0.0421	0.058	0.0547	0.0566	0.0594	0.057	0.0581	0.0548	0.0494	0.0579	0.0549	0.059	0.0598	0.0569	0.0597	0.0554
0.047	0.061	0.0546	0.0573	0.0601	0.0567	0.0588	0.0577	0.0415	0.0561	0.053	0.0552	0.0581	0.0557	0.0568	0.054	0.049	0.056	0.0537	0.0582	0.0589	0.0557	0.0587	0.0545
0.0468	0.0587	0.0534	0.056	0.0596	0.0544	0.057	0.0565	0.0417	0.0543	0.0517	0.0543	0.0571	0.0539	0.0551	0.053	0.0489	0.0541	0.0524	0.057	0.0576	0.054	0.0572	0.0536
0.0481	0.0568	0.0529	0.0539	0.0566	0.0585	0.0607	0.0627	0.043	0.0526	0.0511	0.0524	0.0551	0.0527	0.0532	0.0513	0.0452	0.0526	0.0517	0.0545	0.0554	0.0526	0.0551	0.052
0.049	0.0567	0.0527	0.0528	0.0564	0.0531	0.0547	0.0536	0.0444	0.0524	0.0513	0.0509	0.0547	0.0528	0.0529	0.0506	0.0469	0.0524	0.0518	0.054	0.0551	0.0528	0.0551	0.0516
0.0508	0.0575	0.0534	0.0536	0.0572	0.0537	0.0551	0.0544	0.0463	0.0538	0.0521	0.0519	0.0561	0.0539	0.0539	0.0518	0.0488	0.054	0.053	0.0554	0.0566	0.0543	0.0563	0.053
0.0529	0.0598	0.0562	0.0553	0.059	0.0562	0.0571	0.0566	0.0483	0.0562	0.0551	0.0541	0.0582	0.0569	0.0563	0.0539	0.0511	0.0573	0.0565	0.0577	0.0595	0.0574	0.0587	0.0556
0.0542	0.0633	0.0596	0.0577	0.0622	0.0594	0.0606	0.064	0.0499	0.0596	0.0587	0.057	0.062	0.0607	0.0602	0.0572	0.053	0.0613	0.0601	0.0608	0.063	0.0615	0.0631	0.0592
0.0556	0.0674	0.0639	0.0613	0.0665	0.0637	0.0649	0.0642	0.0513	0.0641	0.063	0.0604	0.0664	0.0654	0.0649	0.0619	0.0545	0.0657	0.0644	0.0646	0.068	0.0659	0.068	0.0637
0.0575	0.0719	0.068	0.0654	0.0718	0.0686	0.0696	0.0689	0.0532	0.0686	0.0668	0.0644	0.0709	0.0705	0.0704	0.0666	0.0564	0.071	0.0688	0.0686	0.0727	0.0715	0.0737	0.069
0.0596	0.0762	0.0723	0.0691	0.0759	0.0734	0.0757	0.0789	0.0555	0.0731	0.0716	0.0685	0.0759	0.0749	0.0758	0.0714	0.0589	0.0761	0.0743	0.0731	0.0774	0.0769	0.0792	0.0741
0.063	0.0812	0.0768	0.0731	0.0807	0.0789	0.0791	0.0795	0.0591	0.0786	0.0776	0.0734	0.081	0.0816	0.0821	0.0773	0.0627	0.0826	0.0806	0.0779	0.0832	0.083	0.0857	0.0802
0.0657	0.0866	0.0826	0.0781	0.0868	0.0854	0.0856	0.0924	0.0624	0.0854	0.0843	0.0782	0.0878	0.0876	0.0886	0.0834	0.066	0.09	0.0881	0.0839	0.0903	0.0905	0.0931	0.0869
0.0687	0.0924	0.0885	0.0832	0.0924	0.0919	0.0886	0.0914	0.0662	0.0936	0.0918	0.0855	0.0953	0.0961	0.0967	0.0907	0.0705	0.098	0.0961	0.0912	0.0986	0.0993	0.1018	0.0952
0.0727	0.0991	0.0944	0.0889	0.0983	0.0979	0.0939	0.0975	0.0706	0.1017	0.0997	0.0927	0.1036	0.1046	0.1047	0.0988	0.0755	0.1059	0.1042	0.099	0.1071	0.1082	0.1102	0.1037
0.0755	0.1043	0.1007	0.0952	0.106	0.108	0.1013	0.1102	0.076	0.1101	0.1087	0.1007	0.1123	0.1139	0.1132	0.108	0.081	0.1143	0.1129	0.1076	0.1162	0.1178	0.1209	0.1129
0.0793	0.1153	0.1093	0.103	0.1159	0.1143	0.1072	0.1169	0.0819	0.1199	0.1199	0.11	0.1242	0.1259	0.1225	0.1179	0.0876	0.127	0.1274	0.1181	0.128	0.1316	0.1335	0.1227
0.0854	0.1295	0.1234	0.1132	0.1262	0.1251	0.1125	0.1235	0.0891	0.1346	0.1335	0.1217	0.1391	0.1402	0.1381	0.1321	0.0946	0.1422	0.1446	0.1314	0.1458	0.1485	0.1522	0.1383
0.0883	0.1397	0.1356	0.1232	0.1361	0.1357	0.1185	0.1311	0.097	0.1502	0.1483	0.1369	0.1568	0.1565	0.1537	0.1479	0.1032	0.1588	0.1611	0.1507	0.163	0.1646	0.1677	0.1587
0.0887	0.1433	0.1365	0.1267	0.1384	0.1377	0.1164	0.1327	0.1043	0.1656	0.1599	0.1536	0.1712	0.1684	0.1627	0.161	0.1123	0.1726	0.1735	0.165	0.1776	0.1772	0.1787	0.1736
0.0866	0.1408	0.1369	0.1273	0.1364	0.137	0.1061	0.1308	0.1137	0.1726	0.1717	0.1673	0.1738	0.1796	0.1668	0.1677	0.1239	0.1846	0.1838	0.177	0.1891	0.1883	0.1865	0.1845
0.0823	0.1341	0.1305	0.1216	0.1284	0.1286	0.0935	0.1202	0.126	0.1799	0.1765	0.1754	0.1778	0.1796	0.1713	0.1744	0.1399	0.195	0.1919	0.1858	0.1963	0.1964	0.1906	0.194
0.0777	0.1264	0.1233	0.1152	0.1215	0.1223	0.0864	0.119	0.1352	0.1872	0.1856	0.1826	0.1846	0.1892	0.172	0.1844	0.1566	0.2024	0.2004	0.1948	0.2033	0.2047	0.1951	0.2028
0.0748	0.1185	0.1154	0.1085	0.1102	0.1127	0.0785	0.104	0.1435	0.1931	0.1896	0.1876	0.1889	0.1928	0.171	0.1876	0.1697	0.2159	0.2085	0.2028	0.2089	0.2147	0.2006	0.2066
0.0746	0.1149	0.1132	0.1049	0.1042	0.1087	0.0788	0.1011	0.1493	0.2007	0.1962	0.191	0.1931	0.1976	0.1693	0.1883	0.1806	0.2279	0.2233	0.2184	0.2219	0.2271	0.2136	0.2149
0.0753	0.1129	0.1117	0.1023	0.1031	0.104	0.0727	0.0991	0.1521	0.1973	0.1982	0.1978	0.1974	0.1996	0.1686	0.1904	0.1898	0.2291	0.2242	0.2298	0.2197	0.2248	0.2083	0.2207
0.0762	0.112	0.1102	0.1042	0.099	0.0997	0.0674	0.0921	0.1538	0.1951	0.1975	0.1996	0.1964	0.1987	0.1714	0.1954	0.1958	0.2312	0.2275	0.228	0.2208	0.223	0.2043	0.2249
0.0781	0.1095	0.1114	0.1037	0.077	0.0854	0.0512	0.076	0.1514	0.194	0.196	0.1973	0.1937	0.1941	0.1663	0.1922	0.2097	0.2355	0.2302	0.2284	0.2257	0.2252	0.2054	0.2349
0.0782	0.1068	0.109	0.1016	0.0466	0.0478	0.0351	0.0498	0.1419	0.1903	0.1913	0.1938	0.187	0.1864	0.1567	0.1811	0.2183	0.2396	0.2325	0.2279	0.2248	0.2287	0.2056	0.2322
0.0786	0.1046	0.1049	0.0975	0.0307	0.0293	0.0257	0.0277	0.1261	0.1802	0.1817	0.1856	0.1749	0.1745	0.1339	0.165	0.2144	0.2426	0.2328	0.229	0.2233	0.2299	0.2067	0.2294
0.0777	0.0977	0.0978	0.0925	0.0245	0.0224	0.0213	0.0224	0.1118	0.1693	0.1716	0.174	0.1577	0.1585	0.1029	0.1426	0.2147	0.2463	0.2408	0.2326	0.2259	0.2364	0.2079	0.2311
0.0759	0.0924	0.0914	0.0896	0.0205	0.0254	0.0185	0.0302	0.1046	0.1566	0.1592	0.1612	0.1387	0.1402	0.0795	0.1223	0.2146	0.2424	0.237	0.2307	0.2252	0.2309	0.2053	0.2242
0.0752	0.0894	0.0894	0.0863	0.0178	0.0173	0.0164	0.0178	0.1015	0.1457	0.1513	0.1533	0.1233	0.1245	0.068	0.1086	0.2103	0.2408	0.2334	0.2255	0.2147	0.2264	0.1968	0.2201
0.0707	0.0832	0.083	0.0815	0.0164	0.0208	0.0152	0.0245	0.0998	0.1404	0.143	0.1438	0.1112	0.113	0.0613	0.0982	0.2061	0.2395	0.2312	0.2227	0.2099	0.2234	0.1894	0.216
0.0632	0.0751	0.0793	0.0735	0.0154	0.015	0.014	0.0155	0.0975	0.1376	0.1417	0.1405	0.1031	0.1067	0.0553	0.0904	0.202	0.2397	0.2286	0.2202	0.2048	0.2205	0.1827	0.2121
0.0522	0.0552	0.0643	0.0628	0.0143	0.0151	0.0133	0.0242	0.0904	0.128	0.1351	0.138	0.0951	0.0977	0.0487	0.0821	0.1968	0.2346	0.2256	0.2182	0.1979	0.2172	0.1759	0.208
0.0418	0.0395	0.0464	0.0519	0.0136	0.013	0.0126	0.0188	0.0798	0.1301	0.1331	0.1354	0.0847	0.0868	0.0419	0.0706	0.1932	0.2367	0.2228	0.2156	0.1915	0.2142	0.1693	0.2032
0.0338	0.0267	0.0312	0.0396	0.0131	0.0126	0.0124	0.0134	0.0649	0.1255	0.1306	0.1336	0.0713	0.0723	0.0342	0.0589	0.1896	0.2353	0.2197	0.2126	0.1849	0.2088	0.1634	0.1986
0.0283	0.0213	0.0243	0.0313	0.0132	0.0203	0.0141	0.0242	0.0511	0.1246	0.1251	0.1315	0.0602	0.0597	0.027	0.0498	0.1877	0.234	0.2162	0.2104	0.1776	0.2045	0.1637	0.1972
0.0238	0.0197	0.0204	0.0257	0.0142	0.018	0.0134	0.0187	0.0414	0.1183	0.1214	0.1238	0.0506	0.0511	0.0215	0.042	0.1766	0.232	0.2113	0.2091	0.1701	0.1984	0.1551	0.1917
0.0215	0.0188	0.0189	0.0224	0.0153	0.0139	0.018	0.0249	0.0334	0.1121	0.1155	0.1178	0.0423	0.0436	0.018	0.0346	0.1684	0.2289	0.2062	0.2032	0.1581	0.1916	0.1368	0.1736
0.0199	0.0109	0.0181	0.0201	0.0155	0.0203	0.0117	0.017	0.0278	0.0996	0.1107	0.1129	0.035	0.0376	0.0162	0.028	0.1595	0.2178	0.2006	0.1986	0.1443	0.182	0.1221	0.1618
0.0187	0.0176	0.0172	0.018	0.0159	0.0165	0.0118	0.0173	0.0238	0.0989	0.1029	0.1058	0.0285	0.0301	0.0152	0.023	0.1495	0.2183	0.1922	0.19	0.1286	0.1753	0.1088	0.1482
0.0179	0.013	0.0168	0.0166	0.0159	0.0148	0.0117	0.0131	0.0209	0.087	0.0963	0.1	0.0235	0.0252	0.015	0.0197	0.1421	0.2069	0.1856	0.1812	0.1127	0.1712	0.0936	0.1333
0.0178	0.0172	0.0166	0.0162	0.018	0.0122	0.0118	0.0234	0.0191	0.0838	0.0901	0.0941	0.0208	0.022	0.015	0.0184	0.1375	0.2059	0.1765	0.1738	0.0986	0.1488	0.083	0.1202
0.0173	0.0169	0.0162	0.0153	0.0141	0.0127	0.0118	0.0143	0.0178	0.077	0.0846	0.0886	0.0198	0.0209	0.0142	0.0176	0.1334	0.2065	0.1691	0.1734	0.0857	0.1434	0.0672	0.1068
0.0171	0.0166	0.0161	0.0152	0.0122	0.016	0.0118	0.0185	0.0171	0.0673	0.076	0.0802	0.0187	0.0196	0.0145	0.017	0.1305	0.1964	0.1662	0.166	0.0715	0.1276	0.0621	0.0943
0.017	0.0121	0.0161	0.0153	0.012	0.0124	0.0175	0.0132	0.0164	0.0538	0.0681	0.0706	0.0183	0.0193	0.0142	0.0168	0.128	0.1821	0.1648	0.1635	0.0589	0.1148	0.0525	0.0813
0.0172	0.0162	0.0159	0.0148	0.0136	0.0119	0.0116	0.0204	0.0159	0.0501	0.0581	0.0608	0.0175	0.0199	0.0141	0.0162	0.1243	0.1802	0.1628	0.1572	0.0503	0.1017	0.0402	0.0693
0.0169	0.0161	0.0156	0.0145	0.0117	0.0131	0.0115	0.0178	0.0152	0.043	0.0495	0.0507	0.0172	0.0184	0.0138	0.0161	0.1233	0.1781	0.1589	0.1574	0.0417	0.0839	0.0318	0.0603
0.0168	0.0117	0.0155	0.0145	0.0137	0.0117	0.0116	0.0157	0.0149	0.0332	0.043	0.0434	0.0168	0.0181	0.0137	0.0157	0.1207	0.1723	0.157	0.1541	0.0345	0.0677	0.0305	0.0466
0.0168	0.0086	0.0155	0.0144	0.0118	0.017	0.0116	0.0175	0.0147	0.025	0.0377	0.0372	0.0171	0.0172	0.014	0.016	0.1172	0.1627	0.1519	0.1533	0.0292	0.0566	0.0239	0.0393
0.0171	0.0104	0.0156	0.0143	0.0117	0.0117	0.0117	0.0136	0.0148	0.0228	0.0327	0.0327	0.0169	0.0169	0.0137	0.0159	0.1154	0.1649	0.1513	0.1497	0.0251	0.047	0.0194	0.0332
0.0173	0.0112	0.0149	0.0146	0.0129	0.0117	0.0117	0.0217	0.0147	0.0201	0.0282	0.0291	0.0165	0.018	0.0136	0.0157	0.1137	0.1709	0.1449	0.1506	0.0228	0.0404	0.0184	0.0289
0.0173	0.0137	0.0154	0.0143	0.0114	0.013	0.0118	0.0176	0.0148	0.0202	0.0253	0.0254	0.0162	0.0168	0.0137	0.0154	0.1096	0.1653	0.1451	0.1438	0.021	0.0348	0.0183	0.0254
0.0175	0.0117	0.0152	0.014	0.0114	0.0135	0.0117	0.0179	0.0147	0.0161	0.0227	0.0223	0.0164	0.0167	0.0135	0.0157	0.1061	0.1657	0.1439	0.1413	0.0195	0.0298	0.0171	0.0235
0.0177	0.0148	0.015	0.0141	0.0112	0.0133	0.0118	0.0178	0.0147	0.0177	0.0207	0.021	0.0163	0.0172	0.0134	0.0155	0.1009	0.1644	0.139	0.1429	0.0186	0.0269	0.0168	0.0221
0.0177	0.0147	0.015	0.014	0.011	0.0172	0.0119	0.0197	0.0148	0.0165	0.0195	0.0191	0.016	0.0165	0.0134	0.0154	0.0956	0.1501	0.1382	0.1397	0.0177	0.0245	0.0215	0.0207
0.0177	0.0143	0.0146	0.0137	0.011	0.0167	0.012	0.0186	0.0145	0.0154	0.018	0.0179	0.0159	0.0163	0.0134	0.0157	0.0894	0.1454	0.1331	0.1354	0.0171	0.0227	0.0209	0.0199
0.0181	0.0079	0.0145	0.0139	0.0109	0.0112	0.012	0.0183	0.0147	0.0085	0.0174	0.0176	0.0158	0.016	0.0132	0.0156	0.0836	0.1356	0.1268	0.1313	0.0165	0.021	0.0158	0.0192
0.0179	0.0074	0.0143	0.0138	0.0107	0.0122	0.012	0.0194	0.0146	0.0076	0.0166	0.0174	0.0153	0.0168	0.0132	0.0158	0.077	0.127	0.1217	0.126	0.0158	0.02	0.0157	0.0188
0.0183	0.0137	0.0147	0.0133	0.0106	0.0167	0.0153	0.0233	0.0145	0.0137	0.0167	0.0163	0.0154	0.0159	0.013	0.016	0.0704	0.1277	0.1138	0.1188	0.0157	0.0191	0.0158	0.0183
0.0006	0.0133	0.0144	0.0135	0.0103	0.0172	0.012	0.0188	-0.0031	0.0131	0.0162	0.0167	0.0149	0.0166	0.0128	0.0154	0.0461	0.1198	0.1068	0.1129	0.0152	0.0181	0.0151	0.018
0.0188	0.0062	0.0144	0.0135	0.0105	0.0111	0.0123	0.0199	0.0148	0.006	0.016	0.0161	0.0149	0.0156	0.0129	0.0155	0.0573	0.1051	0.1004	0.1056	0.015	0.0178	0.0151	0.0175
0.019	0.0065	0.0141	0.0131	0.0101	0.0111	0.0123	0.0204	0.015	0.0063	0.0159	0.0154	0.0145	0.0151	0.013	0.0154	0.0507	0.0988	0.0928	0.0984	0.0144	0.017	0.0229	0.0173
0.0192	0.0055	0.0138	0.0129	0.0099	0.0173	0.0123	0.0209	0.0148	0.0051	0.0152	0.0154	0.0144	0.0155	0.0126	0.0156	0.0438	0.0889	0.0858	0.0956	0.014	0.0164	0.0177	0.0202
0.0196	0.0123	0.0137	0.0133	0.0121	0.0106	0.0125	0.0208	0.015	0.0117	0.0151	0.0156	0.0143	0.0147	0.0125	0.0153	0.0384	0.0883	0.0788	0.0854	0.0138	0.016	0.016	0.0167
0.0199	0.0119	0.0136	0.0129	0.0127	0.0111	0.0123	0.0249	0.0151	0.0113	0.0148	0.0151	0.0138	0.0145	0.0125	0.0151	0.0335	0.0812	0.0724	0.0789	0.0133	0.0155	0.0149	0.0165
0.0201	0.0117	0.0138	0.0129	0.0093	0.0116	0.0125	0.0187	0.015	0.0111	0.0146	0.0147	0.0135	0.0141	0.0122	0.015	0.0292	0.0748	0.0669	0.0734	0.0129	0.015	0.0142	0.0163
0.0203	0.0113	0.0136	0.0129	0.0092	0.0155	0.0129	0.0236	0.0151	0.0105	0.0146	0.0149	0.0135	0.0143	0.0122	0.0148	0.026	0.0684	0.0611	0.0684	0.0125	0.0148	0.0139	0.0161
0.0207	0.0108	0.0133	0.0127	0.0101	0.0101	0.0126	0.0219	0.0152	0.01	0.014	0.015	0.0127	0.0149	0.0119	0.0148	0.0233	0.0628	0.0559	0.0634	0.012	0.0144	0.0135	0.0161
0.0213	0.0106	0.0131	0.0128	0.0085	0.0098	0.0131	0.0164	0.0154	0.0098	0.0138	0.0146	0.0125	0.0136	0.0119	0.0149	0.0215	0.0574	0.0507	0.0602	0.0115	0.0139	0.0134	0.0155
0.0216	0.0103	0.0131	0.0128	0.0082	0.0098	0.0129	0.0235	0.0156	0.0094	0.0137	0.0145	0.0122	0.0133	0.0116	0.0146	0.0199	0.0522	0.0461	0.0541	0.0111	0.0134	0.0158	0.0153
0.0222	0.0097	0.0128	0.0126	0.0082	0.0092	0.0129	0.0214	0.0157	0.0088	0.0133	0.0145	0.0117	0.0139	0.0115	0.0147	0.0187	0.0468	0.0411	0.0489	0.0106	0.0129	0.013	0.0151
0.0228	0.0095	0.0129	0.0127	0.0085	0.0089	0.0132	0.0214	0.0159	0.0085	0.0133	0.0142	0.0112	0.0124	0.0114	0.0147	0.0179	0.0419	0.0369	0.0447	0.0101	0.0125	0.0209	0.0151
0.0233	0.009	0.0125	0.0126	0.0073	0.013	0.0132	0.0255	0.0161	0.0078	0.0129	0.0138	0.011	0.0122	0.0111	0.0144	0.0173	0.0372	0.0326	0.0402	0.0095	0.012	0.0122	0.0146
0.0237	0.0084	0.0125	0.0126	0.0072	0.0088	0.0137	0.0159	0.0162	0.0073	0.0125	0.0143	0.0102	0.0128	0.011	0.014	0.0167	0.0326	0.0289	0.041	0.009	0.0113	0.0121	0.0143
0.024	0.0079	0.0114	0.0126	0.0067	0.008	0.0133	0.0162	0.0162	0.0066	0.0114	0.0135	0.01	0.0113	0.0105	0.0138	0.0159	0.0279	0.0245	0.0329	0.0085	0.0107	0.0114	0.0218
0.0254	0.0075	0.0156	0.0166	0.0062	0.0079	0.0137	0.0164	0.0167	0.0061	0.0121	0.0135	0.0095	0.011	0.0105	0.014	0.0157	0.0239	0.022	0.0297	0.0077	0.0103	0.0111	0.0137
0.0253	0.007	0.0117	0.0123	0.0056	0.0077	0.0136	0.0166	0.0166	0.0056	0.0114	0.0133	0.0089	0.0103	0.0102	0.0141	0.0151	0.02	0.019	0.0267	0.0069	0.0096	0.0105	0.0134
0.0259	0.0065	0.0118	0.0124	0.0051	0.0072	0.0138	0.0168	0.0166	0.0049	0.0113	0.0131	0.0078	0.0105	0.0099	0.0136	0.0145	0.0165	0.0168	0.0239	0.0061	0.0155	0.0103	0.0131
0.0266	-0.0013	0.0117	0.0122	0.0048	0.0128	0.014	0.0279	0.0171	-0.003	0.0109	0.0128	0.0077	0.0096	0.0098	0.0135	0.0143	0.0061	0.0147	0.0211	0.0055	0.0081	0.0099	0.0127
0.0274	0.0053	0.0114	0.0123	0.0043	0.0106	0.0139	0.0255	0.0173	0.0036	0.0104	0.0128	0.0067	0.0087	0.0094	0.0136	0.014	0.0107	0.0128	0.0191	0.0047	0.0075	0.0136	0.0124
0.0282	0.0046	0.0108	0.0121	0.0037	0.006	0.0138	0.0176	0.0176	0.0027	0.0097	0.0126	0.0062	0.0091	0.0088	0.0135	0.0137	0.0082	0.011	0.017	0.004	0.0067	0.0087	0.0121
0.0289	0.0038	0.011	0.012	0.0031	0.0052	0.0132	0.0174	0.0178	0.0019	0.0094	0.012	0.005	0.0072	0.0083	0.013	0.0133	0.0057	0.0098	0.0151	0.0027	0.0056	0.008	0.0112
0.0297	0.0034	0.0108	0.012	0.0026	0.0051	0.0145	0.0179	0.0178	0.0012	0.0092	0.0117	0.0046	0.0069	0.0082	0.0131	0.0129	0.0041	0.0086	0.0139	0.0018	0.0049	0.0076	0.011
0.0306	0.0023	0.0101	0.0118	0.0018	0.0044	0.0148	0.0352	0.0183	-0.0001	0.0081	0.0117	0.0031	0.0071	0.0078	0.0127	0.0125	0.0019	0.0069	0.0128	0.0008	0.004	0.0107	0.0106
0.0318	0.0016	0.01	0.0119	0.0013	0.004	0.0147	0.0183	0.0188	-0.0009	0.0078	0.0108	0.0025	0.0053	0.0072	0.0124	0.0123	0.0002	0.006	0.0125	-0.0001	0.0031	0.0091	0.0101
0.0328	0.0007	0.0099	0.0118	0.0005	0.0052	0.0147	0.0277	0.0191	-0.0021	0.0074	0.0108	0.0012	0.0043	0.0069	0.0123	0.0119	-0.0016	0.005	0.0111	-0.0015	0.0017	0.0066	0.0095
0.0337	-0.0006	0.0094	0.0117	-0.0005	0.0027	0.0147	0.0187	0.0192	-0.0034	0.0066	0.0102	0	0.0034	0.0062	0.012	0.0113	-0.0036	0.0037	0.0102	-0.0029	0.0009	0.0048	0.0087

## Sheet: 6D
MOI 0.001		MOI 0.0001		MOI 0.00001
EV	LidI	EV	LidI	EV	LidI
611000000	59600000	329000000	9040000	230000000	14900000
633000000	57400000	153000000	7630000	282000000	13800000
578000000	67800000	230000000	13000000	363000000	25700000
389000000	67800000	184000000	9040000	456000000	16200000
