# Supplementary material for: Dominant Vibrio cholerae phage exhibits lysis inhibition sensitive to disruption by a defensive phage satellite
Source: eLife. 2020 Apr 24;9:e53200. doi: 10.7554/eLife.53200 (PMC7182436; doi:10.7554/eLife.53200)
Supplement: Figure 6—figure supplement 4—source data 1. [file elife-53200-fig6-figsupp4-data1.xlsx]

## Sheet: 6A
None	A	B	C
0.105455	0.183137	0.27707	0.87541
0.137931	0.0995327	0.293897	0.0744
0.0897727	0.186452	0.0391304	0.0866667
0.118919	0.239655	0.223377	0.262255
0.121667	0.127778		0.134483
0.123684	0.0897059		0.0826087

## Sheet: 6B
EOP LidI Phages PLE 1/PLE (-)	EOP EV Phages PLE 1/PLE (-)
0.004	0.00305
0.00351351	0.0047619
0.00181818	0.00366
0.00206897	0.004875
