# Supplementary material for: Dominant Vibrio cholerae phage exhibits lysis inhibition sensitive to disruption by a defensive phage satellite
Source: eLife. 2020 Apr 24;9:e53200. doi: 10.7554/eLife.53200 (PMC7182436; doi:10.7554/eLife.53200)
Supplement: Figure 6—source data 1. [file elife-53200-fig6-data1.xlsx]

## Sheet: 6A
	Control					LidI PLE 1
Time of induction	-20	0	20	40	(-)	-20	0	20	40	(-)
	1570000000	3690000000	2570000000	3560000000	4020000000	30952380	211000000	2540000000	1960000000	3330000000
	476000000	667000000	1230000000	1480000000	1730000000	209876	28735630	940000000	1070000000	1840000000
	1950000000	1840000000	2070000000	3330000000	2110000000	881226	149425	251000000	988000000	3150000000
	1790000000	2820000000	193000000	82125600	329000000	24904220	1397849	333000000	1810000000	1030000000
		333000000	286000000	461000000	535000000		10069440	556000000	470000000	1700000000
		1080000000	2080000000	2180000000	2040000000		26143790	1830000000	1800000000	2990000000
		1720000000	784000000	1310000000	1210000000		65972220	729000000	729000000	2030000000
			1780000000	1050000000	1930000000			3980000000	4590000000	729000000
			1600000000	3510000000	3820000000			121000000	227000000	5520000000
								1380000000	3600000000	232000000
										3300000000

## Sheet: 6B
LidI PLE 4
-20	0	20	40	(-)
5555556	353000000	3960000000	4830000000	6380000000
3367003	108000000	1990000000	2760000000	2900000000
96618360	407000000	3380000000	3070000000	3420000000
20164610	12186380	3010000000	1850000000	2960000000
	3942652	2390000000	2560000000	4780000000
	111000000	218000000	157000000	295000000
	18637990	484000000	1050000000	855000000
		219000000	302000000	2790000000
		6480000000	7870000000	309000000
		3490000000	3330000000	9260000000
				3600000000

## Sheet: 6D
No Target		Spacer A		Spacer B		Spacer C
EV	LidI	EV	LidI	EV	LidI	EV	LidI
275000000	29000000	85000000	15566670	209333	58000	30500	26700
290000000	40000000	107000000	10650000	71000	20866.7	62500	4650
440000000	39500000	77500000	14450000	44000	8300	75000	6500
370000000	44000000	29000000	6950000	46000	1800	68000	17833.3
300000000	36500000	63000000	8050000	77000	17200	29000	3900
380000000	47000000	68000000	6100000			69000	5700

## Sheet: 6E
EV plaque on PLE 1	LidI plaque on PLE 1	EV permissive plaques	LidI permissive plaques
203333	13333.3	66666670	3333333
222222	14444.4	46666670	4111111
203333	6666.67	55555560	3666667
130000	6666.67	26666670	3222222
