# Supplementary material for: Dominant Vibrio cholerae phage exhibits lysis inhibition sensitive to disruption by a defensive phage satellite
Source: eLife. 2020 Apr 24;9:e53200. doi: 10.7554/eLife.53200 (PMC7182436; doi:10.7554/eLife.53200)
Supplement: Source data 1. [file elife-53200-data1.xlsx]

## Sheet: Supp Table 2 Source Data
GenBank Number	GenBank Description	Predicted Transmembrane Domains (TMD)	Organism	Is an ArrA homolog present?	Upstream Gene	Number of TMD in Upstream Gene	GenBank Description of Upstream Gene	Downstream Gene	Number of TMD in Downstream Gene	GenBank Description of Downstream Gene
SIT65469.1	hypothetical protein	2	Burkholderia sp. b14	No	SIT65468.1	0	predicted peptidoglycan domain-containing protein	SIT65470.1	0	Ferritin-like
WP_013436832.1	hypothetical protein	2	Paraburkholderia rhizoxinica	No	WP_157864650.1	0	hypothetical protein	WP_013436833.1	0	S8 family serine peptidase
WP_088931650.1	hypothetical protein	3	Burkholderia multivorans	No	WP_088931624.1	0	N-acetylmuramidase	WP_140402415.1	0	hypothetical protein
WP_088924665.1	hypothetical protein	2	Burkholderia multivorans	No	WP_088924179.1	0	glycoside hydrolase family 108 protein	WP_088924181.1	0	hypothetical protein
WP_105812309.1	hypothetical protein	2	Burkholderia multivorans	No	WP_105812305.1	0	N-acetylmuramidase	WP_006396886.1	0	ABC transporter substrate-binding protein
WP_132258438.1	hypothetical protein	1	Paucimonas lemoignei	No	WP_132258437.1	0	N-acetylmuramidase	WP_132258439.1	0	DNA adenine methylase
WP_133125764.1	hypothetical protein	1	Thalassospira marina	No	WP_133125763.1	0	hypothetical protein	WP_101264678.1	0	DUF882 domain-containing protein
WP_124446108.1	hypothetical protein	0	Paucibacter sp. KBW04	No	WP_124446107.1	1	hypothetical protein	WP_124446109.1	0	transcriptional regulator
WP_017511691.1	hypothetical protein	2	Cupriavidus metallidurans	No	WP_017511692.1	0	N-acetylmuramidase	WP_017511690.1	1	hypothetical protein
WP_114422051.1	hypothetical protein	2	Pusillimonas sp. EA3	No	WP_147269402.1	0	hypothetical protein	WP_114422053.1	0	secretion activator protein
WP_052045822.1	hypothetical protein	0	Candidatus Paracaedibacter symbiosus	No	WP_032112220.1	0	ATP-dependent DNA helicase RecG	WP_032112221.1	0	cell wall hydrolase
WP_051908676.1	hypothetical protein	2	Candidatus Paracaedibacter acanthamoebae	No	WP_038464790.1	0	ATP-dependent DNA helicase RecG	WP_038464792.1	0	cell wall hydrolase
WP_010297199.1	hypothetical protein	0	Candidatus Odyssella thessalonicensis	No	WP_033444401.1	0	cell wall hydrolase	WP_010297202.1	0	ATP-dependent DNA helicase RecG
WP_130153665.1	hypothetical protein	0	Candidatus Finniella inopinata	No	WP_130153664.1	0	hypothetical protein	WP_130153666.1	0	cell wall hydrolase
PIZ34302.1	hypothetical protein	0	Alphaproteobacteria bacterium CG_4_10_14_0_8_um_filter_37_21	No	PIZ34301.1	0	ATP-dependent Clp protease ATP-binding subunit ClpX	PIZ34303.1	0	cell wall hydrolase
WP_031934432.1	hypothetical protein	3	Candidatus Hepatobacter penaei	No	WP_031934431.1	0	Hsp20 family protein	WP_031934433.1	0	hypothetical protein
EKE09818.1	hypothetical protein	1	uncultured bacterium	No	EKE09817.1	0	hypothetical protein	EKE09819.1	0	hypothetical protein
WP_085783698.1	hypothetical protein	2	Candidatus Nucleicultrix amoebiphila	No	WP_085783697.1	0	hypothetical protein	WP_085783699.1	0	cell wall hydrolase
OJX06199.1	hypothetical protein	2	Caedibacter sp. 38-128	No	OJX06203.1	0	hypothetical protein	OJX06200.1	0	hypothetical protein
OJX13203.1	hypothetical protein	2	Caedibacter sp. 37-49	No	OJX13202.1	0	prevent-host-death protein	OJX13204.1	0	hypothetical protein
TNC80680.1	hypothetical protein	2	Oleiphilus sp.	No	TNC80679.1	0	phage head morphogenesis protein	TNC80681.1	1	hypothetical protein
AUR95368.1	TMhelix containing protein	2	Vibrio phage 1.206.O._10N.222.51.B10	No	AUR95367.1	0	pectin lyase fold protein	AUR95369.1	0	hypothetical protein
AUR91824.1	TMhelix containing protein	2	Vibrio phage 1.165.O._10N.261.51.B7	No	AUR91823.1	0	pectin lyase fold/virulence factor	AUR91825.1	0	hypothetical protein
AUR89825.1	TMhelix containing protein	2	Vibrio phage 1.133.O._10N.222.51.E4	No	AUR89824.1	0	pectin lyase fold protein	AUR89826.1	0	peptidase M15
AUR97460.1	TMhelix containing protein	2	Vibrio phage 1.239.O._10N.261.52.F6	No	AUR97459.1	0	pectin lyase fold/virulence factor	AUR97461.1	0	hypothetical protein
AUR96552.1	TMhelix containing protein	2	Vibrio phage 1.226.O._10N.261.48.E5	No	AUR96551.1	0	pectin lyase fold/virulence factor	AUR96553.1	0	hypothetical protein
AUR91193.1	TMhelix containing protein	2	Vibrio phage 1.157.O._10N.261.45.B7	No	AUR91192.1	0	pectin lyase fold/virulence factor	AUR91194.1	0	hypothetical protein
AUR92725.1	TMhelix containing protein	2	Vibrio phage 1.176.O._10N.261.55.F5	No	AUR92724.1	0	endosialidase	AUR92726.1	0	hypothetical protein
AUR96619.1	TMhelix containing protein	2	Vibrio phage 1.228.O._10N.261.49.C1	No	AUR96618.1	0	pectin lyase fold/virulence factor	AUR96620.1	0	peptidase M15
AUR88818.1	TMhelix containing protein	1	Vibrio phage 1.118.A._10N.261.49.F6	No	AUR88817.1	0	hedgehog signaling/DD-peptidase zinc-binding domain protein	AUR88819.1	0	hypothetical protein
AUR91407.1	TMhelix containing protein	1	Vibrio phage 1.160.O._10N.261.48.B11	No	AUR91406.1	0	hedgehog signaling/DD-peptidase zinc-binding domain protein	UR91408.1	0	hypothetical protein
AUR82750.1	TMhelix containing protein	1	Vibrio phage 1.027.O._10N.286.54.B8	No	AUR82749.1	0	hedgehog signaling/DD-peptidase zinc-binding domain protein	AUR82751.1	0	hypothetical protein
AUR83328.1	TMhelix containing protein	1	Vibrio phage 1.033.O._10N.222.49.B8	No	AUR83327.1	0	hedgehog signaling/DD-peptidase zinc-binding domain protein	AUR83329.1	0	hypothetical protein
AUR81707.1	TMhelix containing protein	1	Vibrio phage 1.012.O._10N.261.48.C12	No	AUR81706.1	0	hedgehog signaling/DD-peptidase zinc-binding domain protein	AUR81708.1	0	hypothetical protein
AUR98486.1	TMhelix containing protein	1	Vibrio phage 1.251.O._10N.261.55.E5	No	AUR98485.1	0	N-acetylmuramoyl-L-alanine amidase	AUR98487.1	0	hypothetical protein
AUR86704.1	TMhelix containing protein	1	Vibrio phage 1.088.O._10N.261.46.A1	No	AUR86703.1	0	hedgehog signaling/DD-peptidase zinc-binding domain protein	AUR86705.1	0	hypothetical protein
AUR82452.1	TMhelix containing protein	1	Vibrio phage 1.024.O._10N.261.45.F8	No	AUR82451.1	0	hedgehog signaling/DD-peptidase zinc-binding domain protein	AUR82453.1	0	hypothetical protein
AUR82269.1	TMhelix containing protein	2	Vibrio phage 1.022.O._10N.286.45.A10	No	AUR82268.1	0	hedgehog signaling/DD-peptidase zinc-binding domain protein	AUR82270.1	0	hypothetical protein
AUR83980.1	TMhelix containing protein	1	Vibrio phage 1.046.O._10N.286.52.E3	No	AUR83979.1	0	hedgehog signaling/DD-peptidase zinc-binding domain protein	AUR83981.1	0	hypothetical protein
AUR82367.1	TMhelix containing protein	1	Vibrio phage 1.023.O._10N.222.51.B4	No	AUR82366.1	0	hedgehog signaling/DD-peptidase zinc-binding domain protein	AUR82368.1	2	TMhelix containing protein
YP_004251079.1	previously hypothetical protein; TeaA in this work	2	Vibrio phage ICP1	Yes	YP_004251078.1	0	hypothetical protein	YP_004251080.1	2	hypothetical protein
AUR86320.1	TMhelix containing protein	2	Vibrio phage 1.084.O._10N.261.49.F5	No	AUR86319.1	0	HNH nuclease	AUR86321.1	0	hypothetical protein
AUR92314.1	TMhelix containing protein	2	Vibrio phage 1.170.O._10N.261.52.C3	Yes	AUR92313.1	4	TMhelix containing protein	AUR92315.1	0	hypothetical protein
YP_007673643.1	hypothetical protein	2	Vibrio phage 11895-B1	No	YP_007673642.1	0	hypothetical protein	YP_007673644.1	1	hypothetical protein
AUR94239.1	TMhelix containing protein	2	Vibrio phage 1.193.O._10N.286.52.C6	Yes	AUR94238.1	4	TMhelix containing protein	AUR94240.1	0	hypothetical protein
AUR91666.1	TMhelix containing protein	2	Vibrio phage 1.161.O._10N.261.48.C5	No	AUR91665.1	5	TMhelix containing protein	AUR91667.1	0	hypothetical protein
YP_009222874.1	hypothetical protein	2	Vibrio phage eugene 12A10	Yes	YP_009222873.1	4	hypothetical protein	YP_009222875.1	0	hypothetical protein
WP_035814327.1	hypothetical protein	2	Cupriavidus sp. UYPR2.512	No	WP_018315016.1	1	hypothetical protein	WP_018315018.1	0	glycoside hydrolase family 108 protein
WP_087466141.1	hypothetical protein	2	Cellvibrio sp. PSBB006	No	WP_087466140.1	0	hypothetical protein	WP_087466142.1	0	FAD-binding oxidoreductase
WP_052767709.1	hypothetical protein	2	MULTISPECIES: Vibrio harveyi group	No	WP_047103077.1	0	hypothetical protein	WP_047103080.1	0	hypothetical protein
WP_042478247.1	hypothetical protein	2	Vibrio maritimus	No	WP_042478245.1	0	hypothetical protein	WP_042478249.1	0	hypothetical protein
RKZ77650.1	hypothetical protein	2	Gammaproteobacteria bacterium	No	RKZ77649.1	0	hypothetical protein	NA	NA	NA
WP_016063673.1	hypothetical protein	2	Vibrio parahaemolyticus	No	WP_016063674.1	0	hypothetical protein	WP_016063672.1	0	hypothetical protein
WP_108945611.1	hypothetical protein	2	Shewanella halifaxensis	No	WP_108945610.1	0	hypothetical protein	WP_108945612.1	0	hypothetical protein
WP_065431281.1	hypothetical protein	2	Vibrio scophthalmi	No	WP_065431280.1	0	hypothetical protein	WP_006713347.1	0	hypothetical protein
WP_006713348.1	hypothetical protein	2	MULTISPECIES: Vibrio	No	WP_006713347.1	0	hypothetical protein	WP_069448126.1	0	hypothetical protein
SHO56151.1	hypothetical protein	2	Vibrio quintilis	No	SHO56150.1	0	hypothetical protein	SHO56152.1	1	hypothetical protein
WP_143169284.1	hypothetical protein	2	Vibrio quintilis	No	WP_073581839.1	0	hypothetical protein	WP_073581845.1	1	thermonuclease family protein
WP_015984652.1	hypothetical protein	2	MULTISPECIES: Gammaproteobacteria	No	WP_144225412.1	0	terminase small subunit	NA	NA	NA
WP_018691467.1	hypothetical protein	2	Algicola sagamiensis	No	WP_018691466.1	0	glycoside hydrolase family protein	WP_018691468.1	0	glutathione-dependent disulfide-bond oxidoreductase
WP_119231305.1	hypothetical protein	2	Pseudoalteromonas piscicida	No	WP_119231304.1	0	phage head morphogenesis protein	WP_119231306.1	0	DUF3164 family protein
WP_099643311.1	hypothetical protein	2	Pseudoalteromonas piscicida	No	WP_099643310.1	0	phage head morphogenesis protein	WP_099643312.1	0	hypothetical protein
WP_070984072.1	hypothetical protein	2	MULTISPECIES: Pseudoalteromonas	No	WP_070984071.1	0	phage head morphogenesis protein	WP_070984073.1	0	DUF3164 family protein
WP_058795354.1	hypothetical protein	2	Pseudoalteromonas rubra	No	WP_058795353.1	0	phage head morphogenesis protein	WP_058795355.1	0	DUF3164 family protein
WP_054015082.1	hypothetical protein	2	Pseudoalteromonas sp. R3	No	WP_054015083.1	0	DUF3164 family protein	WP_054015081.1	0	phage head morphogenesis protein
WP_091980102.1	hypothetical protein	2	Pseudoalteromonas denitrificans	No	WP_091980100.1	0	hypothetical protein	WP_091980104.1	0	phage head morphogenesis protein
WP_055021328.1	hypothetical protein	2	MULTISPECIES: Pseudoalteromonas	No	WP_063705255.1	0	hypothetical protein	WP_055021329.1	0	phage head morphogenesis protein
KZY41757.1	hypothetical protein	2	Pseudoalteromonas shioyasakiensis	No	KZY41756.1	0	phage head morphogenesis protein	NA	NA	NA
WP_138617682.1	hypothetical protein	2	Pseudoalteromonas sp. S2721	No	WP_138617680.1	0	hypothetical protein	WP_138617684.1	0	phage head morphogenesis protein
WP_065979928.1	hypothetical protein	2	Pseudoalteromonas lipolytica	No	WP_065979929.1	0	AbrB/MazE/SpoVT family DNA-binding domain-containing protein	WP_065979927.1	0	phage head morphogenesis protei
WP_118844271.1	hypothetical protein	2	Pseudoalteromonas donghaensis	No	WP_118844270.1	0	phage head morphogenesis protein	WP_118844272.1	0	DUF3164 family protein
WP_105199001.1	hypothetical protein	2	Pseudoalteromonas sp. T1lg10	No	WP_105199000.1	0	hypothetical protein	WP_105199002.1	0	phage head morphogenesis protein
WP_054453581.1	hypothetical protein	2	MULTISPECIES: Pseudoalteromonas	No	WP_064435498.1	0	hypothetical protein	WP_064435443.1	0	phage head morphogenesis protein
WP_011328184.1	hypothetical protein	2	Pseudoalteromonas haloplanktis	No	WP_011328183.1	0	hypothetical protein	WP_011328185.1	0	hypothetical protein
WP_089368278.1	hypothetical protein	2	Pseudoalteromonas nigrifaciens	No	WP_089368277.1	0	phage head morphogenesis protein	WP_089368279.1	0	hypothetical protein
WP_016707177.1	hypothetical protein	2	MULTISPECIES: Pseudoalteromonas	No	WP_016707178.1	0	hypothetical protein	WP_016707176.1	0	hypothetical protein
WP_145233964.1	hypothetical protein	2	Pseudoalteromonas neustonica	No	WP_145233962.1	0	phage head morphogenesis protein	WP_145233966.1	0	hypothetical protein
WP_096793091.1	hypothetical protein	2	Pseudoalteromonas sp. 1_2015MBL_MicDiv	No	WP_096793090.1	0	phage head morphogenesis protein	WP_096793092.1	0	hypothetical protein
WP_055012201.1	hypothetical protein	2	Pseudoalteromonas sp. P1-16-1b	No	WP_055012200.1	0	hypothetical protein	WP_055012202.1	0	phage head morphogenesis protein
WP_076921165.1	hypothetical protein	2	Pseudoalteromonas sp. SK20	No	WP_076921163.1	0	phage head morphogenesis protein	WP_076921167.1	0	hypothetical protein
WP_004586537.1	hypothetical protein	2	MULTISPECIES: Pseudoalteromonas	No	WP_004586536.1	0	hypothetical protein	WP_004586538.1	0	hypothetical protein
WP_039036975.1	hypothetical protein	2	MULTISPECIES: Pseudoalteromonas	No	WP_039036974.1	0	hypothetical protein	WP_039036976.1	0	hypothetical protein
MAJ39423.1	hypothetical protein	2	Pseudoalteromonadaceae bacterium	No	MAJ39422.1	0	phage head morphogenesis protein	NA	NA	NA
WP_029772717.1	hypothetical protein	2	Pseudoalteromonas sp. TB51	No	WP_029772716.1	0	hypothetical protein	WP_029772718.1	0	hypothetical protein

## Sheet: Supp Table 3 Source Data
GenBank Number	GenBank Description	Predicted Transmembrane Domains	Organism	Is an TeaA homolog present?	Upstream Gene	Number of TMD in Upstream Gene	Upstream Gene GenBank Description	Downstream Gene	Number of TMD in Downstream Gene	Downstream Gene GenBank Description
AUR92313.1	TMhelix containing protein	4	Vibrio phage 1.170.O._10N.261.52.C3	Yes	AUR92312.1	1	TMhelix containing protein	AUR92314.1	2	TMhelix containing protein
YP_004251080.1	hypothetical protein	2	Vibrio phage ICP1	Yes	YP_004251079.1	2	hypothetical protein	YP_004251081.1	1	hypothetical protein
AUR87507.1	TMhelix containing protein	2	Vibrio phage 1.101.O._10N.261.45.C6	No	AUR87506.1	1	TMhelix containing protein	AUR87508.1	2	TMhelix containing protein
BAV80889.1	hypothetical protein	2	Vibrio phage RYC	No	BAV80888.1	0	hypothetical protein	BAV80890.1	2	hypothetical protein
AUR89285.1	TMhelix containing protein	2	Vibrio phage 1.121.O._10N.286.46.C4	No	AUR89284.1	1	coil containing protein	AUR89286.1	2	TMhelix containing protein
AUR84891.1	TMhelix containing protein	2	Vibrio phage 1.063.O._10N.261.45.C7	No	AUR84890.1	1	TMhelix containing protein	AUR84892.1	2	TMhelix containing protein
AUR94238.1	TMhelix containing protein	4	Vibrio phage 1.193.O._10N.286.52.C6	Yes	AUR94237.1	1	TMhelix containing protein	AUR94239.1	2	TMhelix containing protein
YP_007877418.1	hypothetical protein	4	Vibrio phage helene 12B3	No	YP_007877417.1	1	hypothetical protein	YP_007877419.1	2	hypothetical protein
YP_009222873.1	hypothetical protein	4	Vibrio phage eugene 12A10	Yes	YP_009222872.1	1	hypothetical protein	YP_009222874.1	2	hypothetical protein
AUR91665.1	TMhelix containing protein	5	Vibrio phage 1.161.O._10N.261.48.C5	No	AUR91664.1	1	TMhelix containing protein	AUR91666.1	2	TMhelix containing protein
AUR93432.1	TMhelix containing protein	4	Vibrio phage 1.187.O._10N.286.49.F1	No	AUR93431.1	1	coil containing protein	AUR93433.1	2	TMhelix containing protein
