# Supplementary material for: Dominant Vibrio cholerae phage exhibits lysis inhibition sensitive to disruption by a defensive phage satellite
Source: eLife. 2020 Apr 24;9:e53200. doi: 10.7554/eLife.53200 (PMC7182436; doi:10.7554/eLife.53200)
Supplement: Supplementary file 4. — Primers used in this work are provided with a description, identifier, and sequence. [file elife-53200-supp4.xlsx]

## Sheet: Sheet1
Primer List
Primer	Identifier	Sequence
primer to construct ΔlacZ::Ptac-lidIPLE 1	KS969	CCTGCTAAGGAGGTAACAACAAGATGAACAAAGAAAAACTATTACAACTACG
primer to construct ΔlacZ::Ptac-lidIPLE 1	KS970	CTCTCATCCGCCAAAACAGCTTATTGAGTTGGTGGTATAAAGTTCAG
primer to construct ΔlacZ::Ptac-lidIPLE 4	SGHpr1	CCTGCTAAGGAGGTAACAACAAGATGAATTTTGTAATAACAAACCGCC
primer to construct ΔlacZ::Ptac-lidIPLE 4	SGHpr2	CTCTCATCCGCCAAAACAGCTCATCTTCCCTTAGTTCTTTTAAATAGG
primer to construct PLE 1 FLAG-LidIPLE 1	SGHpr38	GATTATAAAGATGATGATGACAAAAACAAAGAAAAACTATTACAACTACGATTATACGGGGC
primer to construct PLE 1 FLAG-LidIPLE 1	SGHpr39	CTCTCATCCGCCAAAACAGCTTATTGAGTTGGTGGTATAAAGTTCAGTTTATAG
primer to construct PLE 1 ΔlidI	BJ118	GGTCGACGGATCCCCGGAATCATATTTTTCTAGCCTTTAG
primer to construct PLE 1 ΔlidI	BJ119	CGAAGCAGCTCCAGCCTACATAATATAATAATTAAGGATA
primer to construct PLE 4 ΔlidI	SGHpr100	GGTCGACGGATCCCCGGAATCATAGGTTACACTCTTATTATTATTATTATTGTTGTTGTTGATGCC
primer to construct PLE 4 ΔlidI	SGHpr101	CGAAGCAGCTCCAGCCTACATAAATGATGAAAACATTAAAAAAGCGGATGATGTTACTAG
primer to construct Ptac-teaAICP1	SGHpr52	CCTGCTAAGGAGGTAACAACAAGATGGCACCATTGCTAGCAACAGC
primer to construct Ptac-teaAICP1	SGHpr53	CTCTCATCCGCCAAAACAGCTTATTTCTCCTTAATGTTAATCTTC
primer to construct Ptac-arrAICP1	SGHpr54	CCTGCTAAGGAGGTAACAACAAGATGATCCCATTCCTCCTACCATTAATACTTTGG
primer to construct Ptac-arrAICP1	SGHpr55	CTCTCATCCGCCAAAACAGCTCATAATAAAACGTATTCCATAACCAACATCATCG
primer to construct Ptac-tT4	SGHpr135	GCGTTTCACTTCTGAGTTCGTCATTTAGCCCTTCCTAATATTCTGGCCGC
primer to construct Ptac-tT4	SGHpr140	CCTGCTAAGGAGGTAACAACAAGATGGCAGCACCTAGAATATCATTTTCGCC
primer to costruct Ptac-anti-gp138 spacer	SGHpr45	TTTCTGTGGCAAGATATTCATCATTACCACCTATTATG
primer to costruct Ptac-anti-gp138 spacer	SGHpr50	AAGACATAATAGGTGGTAATGATGAATATCTTGCCACA
primer to construct Ptac-anti-gp138 spacer and repair template	SGHpr159	GAATGGGATCATAACTTACCTTACATTATTGCTTCG
primer to construct Ptac-anti-gp138 spacer and repair template	SGHpr160	CGACGTTGTAAAACGACGGCGCGTGATGCAGTTCTTCTACGAATTG
primer to construct Ptac-spacer A	SGHpr 152	TTTCGGTACCTTCATGACCTAGTAAGCTTTCAAAACTGTCT
primer to construct Ptac-spacer A	SGHpr 153	ACAGTTTTGAAAGCTTACTAGGTCATGAAGGTACCGAAAC
primer to construct Ptac-spacer B	KS1051	TTTCTATATCTAATATATTAGAGGACTCGAAAGAGTCG
primer to construct Ptac-spacer B	KS1052	AAGACGACTCTTTCGAGTCCTCTAATATATTAGATATA
primer to construct Ptac-spacer C	KS1080	TTTCTAACTTCACCAGTTGAGGTGTTGGTGGCTTGGTG
primer to construct Ptac-spacer C	KS1081	AAGACACCAAGCCACCAACACCTCAACTGGTGAAGTTA
